# Supplementary material for: Birefringence and polarized luminescence of a manganese(ii) chloride–triphenylphosphine oxide compound: application in LEDs and photolithography
Source: Royal Society of Chemistry journal article supplement (doi:10.1039/d3qm00093a), 2023-01-01
Supplement: d3qm00093a1.pdf [file d3qm00093a1.pdf]

## **Birefringence and polarized luminescence of the manganese(II) chloride– triphenylphosphine oxide compound: application in LED and photolithography**

Alexey Berezin

Nikolaev Institute of Inorganic Chemistry, Siberian Branch of Russian Academy of Sciences, Acad. Lavrentiev Ave. 3, Novosibirsk  
630090, Russian Federation. E-mail: [berezin-1991@ngs.ru](mailto:berezin-1991@ngs.ru), [berezin@niic.nsc.ru](mailto:berezin@niic.nsc.ru)

## Experimental part

### Synthesis of $[(\text{Ph}_3\text{PO})_2\text{MnCl}_2]$ (**1**)

Solid  $\text{MnCO}_3 \cdot x\text{H}_2\text{O}$  (44–46 % Mn, 28.8 mg, 0.250 mmol) and  $\text{Ph}_3\text{PO}$  (139.1 mg, 0.500 mmol) were dissolved separately in warm hydrochloric acid HCl (37% HCl, 1.0 ml, 50°C), and the solutions were mixed. The mixture was evaporated at 50°C down to approximately 0.3 ml volume. Then, warm ethanol (97% EtOH, 4 ml, 50°C) was added, and the mixture was stirred at 50°C for 1 h with gradual cooling down to 20°C for 3 h. Crystals formed on the surface of the glassware. Yield: 137 mg (80% Mn); greenish-yellow crystals.

Solid  $\text{MnCl}_2 \cdot 4\text{H}_2\text{O}$  (49.5 mg, 0.250 mmol) and  $\text{Ph}_3\text{PO}$  (139.1 mg, 0.500 mmol) were dissolved separately in warm ethanol (97% EtOH, 4 ml, 50°C), and the solutions were mixed. Next, warm hydrochloric acid HCl (37% HCl, 0.2 ml, 50°C) was introduced into the mixture followed by stirring at 50°C for 3 h with gradual cooling down to 20°C for 3 h. Crystals formed on the surface of the glassware. Yield: 130 mg (76% Mn); greenish-yellow crystals.

## Methods

Single-crystal X-ray data were collected at 150 K on a Bruker X8 single-crystal diffractometer with a graphite monochromator ( $\lambda(\text{MoK}_\alpha) = 0.71073 \text{ \AA}$ ,  $\omega$ -scans) using an Oxford Cryosystems Cryostream 800 Plus open-flow nitrogen cooler and a Bruker D8 Venture single-crystal diffractometer (Incoatec I $\mu$ S 3.0 microfocus X-ray source with Mo-anode, 3-circle goniometer, PHOTON III C14 CPAD detector). Apex3 v.2018–7.2 software<sup>1</sup> was used for unit cell determination, calculation of the data acquisition strategy, integration, and absorption correction. The obtained *hkl* datasets were processed in Olex2 v.1.5 software<sup>2</sup> along with SHELXT<sup>3</sup> for structure solution and SHELXL<sup>4</sup> for subsequent refinement. All non-hydrogen atoms were refined anisotropically. The crystallographic data and details of the structure refinements are summarized in Tables S1–S4. CCDC 2177623 contains the supplementary crystallographic data for this paper. These data can be obtained free of charge from The Cambridge Crystallographic Data Center at [http://www.ccdc.cam.ac.uk/data\\_request/cif](http://www.ccdc.cam.ac.uk/data_request/cif).

Corrected luminescence spectra were recorded on a Fluorolog 3 spectrometer (Horiba Jobin Yvon) with a cooled PC177CE-010 photon detection module equipped with an R2658 photomultiplier, with continuous 450 W and pulsed (pulse time FWHM 3  $\mu$ s) 50 W Xe-lamps, and with two Czerny–Turner double monochromators. Absolute values of quantum yields were determined using the Quanta- $\phi$  device of Fluorolog 3. Temperature dependences of luminescence were studied using an Optistat DN optical cryostat (Oxford Instruments). The luminescence quantum yield at 77 K was obtained relative to the quantum yield of the same sample at 300 K.<sup>5</sup> Corrected polarization luminescence spectra were acquired on the Fluorolog 3 spectrometer equipped with the two rotated linear polarizers. A film of **1** was prepared on a quartz substrate from a hydrochloric acid/ethanol solution (1:1) (concentration of **1**:  $10^{-4}$  mmol/ml) by the spin-coating method at 5000 rpm for 30 min at 300 K.

The light-emitting diodes (LED) TO-3535BC-UVC265-30-6V-E with  $\lambda_{\text{max}} = 275 \text{ nm}$  were used for the fabrication of a portable light emitter based on **1**. The LED was modified by a film of **1** coated on the LED surface from the ethanol solution. Also, the LED was modified by single crystals of **1** placed on the LED surface.

EPR spectra were recorded on a Varian E-109 spectrometer in X- and Q-bands at 300 K. A 2,2-diphenyl-1-picrylhydrazyl (DPPH) standard sample was employed to calibrate the magnetic field of the spectrometer. The spectra were simulated in MATLAB (The MathWorks Inc., Natick, MA, USA) using the EasySpin software for EPR data.<sup>6</sup>

Powder X-ray diffraction patterns were determined in the 6–40°  $2\theta$  range using a Bruker D8 Advance powder diffractometer (vertical  $\theta$ - $\theta$  goniometer in Bragg-Brentano geometry configuration, Cu-anode sealed tube with no  $\beta$ -filter 40mA @ 40 kV, LYNXEYE XE-T compound silicon strip detector, motorized divergence slit).

Structures of the complexes **1** and **1nl** were optimized by the spin-unrestricted DFT method using the Amsterdam density functional<sup>7, 8</sup> software in the 3D band<sup>9, 10</sup> approximation with gradient exchange functional GGA (BP86—Becke<sup>11</sup> and Perdew<sup>12, 13</sup>), and the triple zeta polarized (TZP) basis set was used. Initial positions of atoms and unit cell parameters were taken from the X-ray structural analysis for **1** and CCDC DEGGIF10 for **1nl**. Frequency analysis was carried out to check the nature of stationary points (BP86, TZP). The  $g$ -tensors<sup>14</sup> were calculated *via* the Spin-Orbit ZORA<sup>15–17</sup> approximation with hybrid functional PBE0.<sup>18, 19</sup> Zero-field splitting (ZFS) parameters were obtained with the method proposed by van Wüllen and coworkers.<sup>20, 21</sup> Electronic excitations were computed by the TD-DFT method<sup>22, 23</sup> (CAM-B3LYP functional<sup>24</sup>, TZP) and additionally with the spin-flip approximation.<sup>25, 26</sup> The quantum theory of atoms in molecules (QTAIM),<sup>27</sup> the extended transition state method with natural orbitals for chemical valence theory (ETS-NOCV), and non-covalent interaction calculations<sup>28–34</sup> were utilized to analyze non-covalent interactions in the ADF software (BP86, TZP).

1 APEX3 (v.2018–7.2). Madison, Wisconsin, USA: Bruker AXS Inc.; 2018.

2 O. V. Dolomanov, L. J. Bourhis, R. J. Gildea, J. A. K. Howard and H. Puschmann, OLEX2: A complete structure solution, refinement and analysis program, *Journal of Applied Crystallography*, 2009, **42**, 339–341, 10.1107/S0021889808042726.

3 G. M. Sheldrick, SHELXT - Integrated space-group and crystal-structure determination, *Acta Crystallographica Section A: Foundations of Crystallography*, 2015, **71**, 3–8, 10.1107/S2053273314026370.

4 G. M. Sheldrick, Crystal structure refinement with SHELXL, *Acta Crystallographica Section C: Structural Chemistry*, 2015, **71**, 3–8, 10.1107/S2053229614024218.

- 5 A. V. Artem'Ev, M. P. Davydova, A. S. Berezin, M. R. Ryzhikov and D. G. Samsonenko, Dicopper(I) Paddle-Wheel Complexes with Thermally Activated Delayed Fluorescence Adjusted by Ancillary Ligands, *Inorganic Chemistry*, 2020, **59**, 10699-10706, 10.1021/acs.inorgchem.0c01171.
- 6 S. Stoll and A. Schweiger, EasySpin, a comprehensive software package for spectral simulation and analysis in EPR, *J. Magn. Reson.*, 2006, **178**, 42-55, 10.1016/j.jmr.2005.08.013.
- 7 G. te Velde, F. M. Bickelhaupt, E. J. Baerends, C. Fonseca Guerra, S. J. A. van Gisbergen, J. G. Snijders and T. Ziegler, Chemistry with ADF, *J. Comput. Chem.*, 2001, **22**, 931-967, 10.1002/jcc.1056.
- 8 ADF 2022.1, SCM, Theoretical Chemistry, Vrije Universiteit, Amsterdam, The Netherlands, <http://www.scm.com>.
- 9 G. Te Velde and E. J. Baerends, Precise density-functional method for periodic structures, *Physical Review B*, 1991, **44**, 7888-7903, 10.1103/PhysRevB.44.7888.
- 10 BAND 2022.1, SCM, Theoretical Chemistry, Vrije Universiteit, Amsterdam, The Netherlands, <http://www.scm.com>.
- 11 A. D. Becke, Density-functional exchange-energy approximation with correct asymptotic behavior, *Physical Review A*, 1988, **38**, 3098-3100, 10.1103/PhysRevA.38.3098.
- 12 J. P. Perdew, Density-functional approximation for the correlation energy of the inhomogeneous electron gas, *Physical Review B*, 1986, **33**, 8822-8824, 10.1103/PhysRevB.33.8822.
- 13 J. P. Perdew, Erratum: Density-functional approximation for the correlation energy of the inhomogeneous electron gas (Physical Review B (1986) 34, 10 (7406)), *Physical Review B*, 1986, **34**, 7406, 10.1103/PhysRevB.34.7406.
- 14 E. Van Lenthe, P. E. S. Wormer and A. Van Der Avoird, Density functional calculations of molecular g-tensors in the zero-order regular approximation for relativistic effects, *J. Chem. Phys.*, 1997, **107**, 2488-2498, 10.1063/1.474590.
- 15 E. Van Lenthe, E. J. Baerends and J. G. Snijders, Relativistic regular two-component Hamiltonians, *The Journal of Chemical Physics*, 1993, **99**, 4597-4610, 10.1063/1.466059.
- 16 E. Van Lenthe, E. J. Baerends and J. G. Snijders, Relativistic total energy using regular approximations, *The Journal of Chemical Physics*, 1994, **101**, 9783-9792, 10.1063/1.467943.
- 17 E. Van Lenthe, Geometry optimizations in the zero order regular approximation for relativistic effects, *J. Chem. Phys.*, 1999, **110**, 8943-8953, 10.1063/1.478813.
- 18 S. Grimme, Accurate description of van der Waals complexes by density functional theory including empirical corrections, *J. Comput. Chem.*, 2004, **25**, 1463-1473, 10.1002/jcc.20078.
- 19 M. Ernzerhof and G. E. Scuseria, Assessment of the Perdew-Burke-Ernzerhof exchange-correlation functional, *J. Chem. Phys.*, 1999, **110**, 5029-5036, 10.1063/1.478401.
- 20 C. Van Wüllen, Magnetic anisotropy from density functional calculations. Comparison of different approaches: Mn12 O12 acetate as a test case, *J. Chem. Phys.*, 2009, **130**, 10.1063/1.3134430.
- 21 S. Schmitt, P. Jost and C. Van Wllen, Zero-field splittings from density functional calculations: Analysis and improvement of known methods, *J. Chem. Phys.*, 2011, **134**, 10.1063/1.3590362.
- 22 S. J. A. Van Gisbergen, J. G. Snijders and E. J. Baerends, Implementation of time-dependent density functional response equations, *Computer Physics Communications*, 1999, **118**, 119-138, 10.1016/S0010-4655(99)00187-3.
- 23 F. Wang and T. Ziegler, A simplified relativistic time-dependent density-functional theory formalism for the calculations of excitation energies including spin-orbit coupling effect, *J. Chem. Phys.*, 2005, **123**, 10.1063/1.2061187.
- 24 T. Yanai, D. P. Tew and N. C. Handy, A new hybrid exchange-correlation functional using the Coulomb-attenuating method (CAM-B3LYP), *Chem. Phys. Lett.*, 2004, **393**, 51-57, 10.1016/j.cplett.2004.06.011.
- 25 F. Wang and T. Ziegler, Time-dependent density functional theory based on a noncollinear formulation of the exchange-correlation potential, *J. Chem. Phys.*, 2004, **121**, 12191-12196, 10.1063/1.1821494.
- 26 F. Wang and T. Ziegler, The performance of time-dependent density functional theory based on a noncollinear exchange-correlation potential in the calculations of excitation energies, *J. Chem. Phys.*, 2005, **122**, 10.1063/1.1844299.
- 27 R. F. W. Bader, A Quantum Theory of Molecular Structure and Its Applications, *Chem. Rev.*, 1991, **91**, 893-928, 10.1021/cr00005a013.
- 28 M. P. Mitoraj, A. Michalak and T. Ziegler, A combined charge and energy decomposition scheme for bond analysis, *Journal of Chemical Theory and Computation*, 2009, **5**, 962-975, 10.1021/ct800503d.
- 29 J. I. Rodríguez, An efficient method for computing the QTAIM topology of a scalar field: The electron density case, *J. Comput. Chem.*, 2013, **34**, 681-686, 10.1002/jcc.23180.
- 30 J. I. Rodríguez, R. F. W. Bader, P. W. Ayers, C. Michel, A. W. Götz and C. Bo, A high performance grid-based algorithm for computing QTAIM properties, *Chem. Phys. Lett.*, 2009, **472**, 149-152, 10.1016/j.cplett.2009.02.081.
- 31 E. R. Johnson, S. Keinan, P. Mori-Sánchez, J. Contreras-García, A. J. Cohen and W. Yang, Revealing noncovalent interactions, *J. Am. Chem. Soc.*, 2010, **132**, 6498-6506, 10.1021/ja100936w.

32 J. Contreras-García, E. R. Johnson, S. Keinan, R. Chaudret, J. P. Piquemal, D. N. Beratan and W. Yang, NCIPLOT: A program for plotting noncovalent interaction regions, *Journal of Chemical Theory and Computation*, 2011, **7**, 625-632, 10.1021/ct100641a.

33 M. Aarabi, S. Gholami and S. J. Grabowski, S–H...O and O–H...O Hydrogen Bonds-Comparison of Dimers of Thiocarboxylic and Carboxylic Acids, *Chemphyschem*, 2020, **21**, 1653-1664, 10.1002/cphc.202000131.

34 J. Poater, M. Gimferrer and A. Poater, Covalent and Ionic Capacity of MOFs to Sorb Small Gas Molecules, *Inorganic Chemistry*, 2018, **57**, 6981-6990, 10.1021/acs.inorgchem.8b00670.

**Table S1.** X-Ray crystallographic data for **1**.

|                                             |                                                                                 |
|---------------------------------------------|---------------------------------------------------------------------------------|
| Empirical formula                           | C <sub>36</sub> H <sub>30</sub> Cl <sub>2</sub> MnO <sub>2</sub> P <sub>2</sub> |
| Formula weight                              | 682.38                                                                          |
| Temperature/K                               | 150.00                                                                          |
| Crystal system                              | monoclinic                                                                      |
| Space group                                 | P2 <sub>1</sub> /n                                                              |
| a/Å                                         | 18.1040(6)                                                                      |
| b/Å                                         | 10.1744(3)                                                                      |
| c/Å                                         | 19.4063(5)                                                                      |
| α/°                                         | 90                                                                              |
| β/°                                         | 115.6240(10)                                                                    |
| γ/°                                         | 90                                                                              |
| Volume/Å <sup>3</sup>                       | 3223.03(17)                                                                     |
| Z                                           | 4                                                                               |
| ρ <sub>calc</sub> /cm <sup>3</sup>          | 1.406                                                                           |
| μ/mm <sup>-1</sup>                          | 0.707                                                                           |
| F(000)                                      | 1404.0                                                                          |
| Crystal size/mm <sup>3</sup>                | 0.114 × 0.083 × 0.082                                                           |
| Radiation                                   | MoKα (λ = 0.71073)                                                              |
| 2θ range for data collection/°              | 4.082 to 66.354                                                                 |
| Index ranges                                | -27 ≤ h ≤ 24, -15 ≤ k ≤ 15, -29 ≤ l ≤ 29                                        |
| Reflections collected                       | 43485                                                                           |
| Independent reflections                     | 12282 [R <sub>int</sub> = 0.0348, R <sub>sigma</sub> = 0.0398]                  |
| Data/restraints/parameters                  | 12282/0/388                                                                     |
| Goodness-of-fit on F <sup>2</sup>           | 1.022                                                                           |
| Final R indexes [I >= 2σ(I)]                | R <sub>1</sub> = 0.0352, wR <sub>2</sub> = 0.0766                               |
| Final R indexes [all data]                  | R <sub>1</sub> = 0.0520, wR <sub>2</sub> = 0.0826                               |
| Largest diff. peak/hole / e Å <sup>-3</sup> | 0.38/-0.30                                                                      |

**Table S2.** Fractional Atomic Coordinates (×10<sup>4</sup>) and Equivalent Isotropic Displacement Parameters (Å<sup>2</sup>×10<sup>3</sup>) for **1**.  $U_{eq}$  is defined as 1/3 of the trace of the orthogonalised  $U_{ij}$  tensor.

| Atom | x         | y          | z         | U(eq)     |
|------|-----------|------------|-----------|-----------|
| Mn01 | 2442.4(2) | 2809.9(2)  | 5177.9(2) | 14.09(4)  |
| Cl02 | 2969.0(2) | 1161.0(3)  | 4684.5(2) | 24.08(7)  |
| P003 | 2560.9(2) | 5852.0(3)  | 4419.9(2) | 14.49(6)  |
| Cl04 | 1026.8(2) | 2688.4(3)  | 4730.4(2) | 24.66(7)  |
| P005 | 3717.8(2) | 2894.4(3)  | 7133.4(2) | 17.80(7)  |
| O006 | 2723.3(5) | 4612.1(9)  | 4883.4(5) | 19.64(18) |
| O007 | 3054.7(6) | 2854.5(10) | 6328.5(5) | 24.2(2)   |
| C008 | 2178.8(7) | 5481.4(12) | 3418.0(7) | 16.6(2)   |
| C009 | 3489.6(7) | 6769.3(12) | 4667.5(7) | 17.2(2)   |
| C00A | 1829.2(7) | 6871.7(12) | 4557.2(7) | 16.5(2)   |
| C00B | 3338.8(8) | 3583.5(13) | 7768.7(7) | 21.1(2)   |
| C00C | 1666.6(8) | 8164.1(13) | 4284.6(8) | 20.0(2)   |
| C00D | 1385.1(8) | 6325.7(13) | 4924.1(8) | 20.6(2)   |
| C00E | 2184.7(8) | 6428.4(13) | 2900.8(8) | 22.7(3)   |
| C00F | 3669.8(8) | 7910.9(12) | 5105.5(8) | 20.3(2)   |
| C00G | 4115.4(8) | 1285.8(12) | 7476.3(7) | 19.9(2)   |
| C00H | 1861.5(8) | 4234.0(13) | 3149.3(8) | 22.5(3)   |
| C00I | 630.7(8)  | 8340.3(14) | 4739.6(8) | 24.3(3)   |
| C00J | 3691.1(9) | 4693.2(14) | 8210.0(8) | 26.2(3)   |

|      |            |             |            |         |
|------|------------|-------------|------------|---------|
| C00K | 784.2(8)   | 7062.6(14)  | 5007.3(8)  | 23.6(3) |
| C00L | 5359.8(8)  | 3638.8(13)  | 7754.8(8)  | 23.0(3) |
| C00M | 4433.5(9)  | 4879.0(14)  | 6661.7(8)  | 26.1(3) |
| C00N | 4569.6(8)  | 3869.2(12)  | 7190.1(7)  | 19.9(2) |
| C00O | 6007.8(9)  | 4397.3(14)  | 7782.9(8)  | 27.2(3) |
| C00P | 1564.0(9)  | 3950.1(14)  | 2373.7(8)  | 26.2(3) |
| C00Q | 2658.9(9)  | 2996.2(16)  | 7802.5(8)  | 28.8(3) |
| C00R | 4985.9(9)  | 8034.5(15)  | 5079.7(9)  | 27.9(3) |
| C00S | 1889.8(9)  | 6134.6(14)  | 2128.7(8)  | 26.2(3) |
| C00T | 4468.2(9)  | 580.4(14)   | 7078.7(9)  | 28.4(3) |
| C00U | 4416.7(8)  | 8541.7(13)  | 5304.5(8)  | 24.5(3) |
| C00V | 1073.8(8)  | 8897.3(13)  | 4381.9(8)  | 23.9(3) |
| C00W | 1582.4(9)  | 4891.4(15)  | 1866.3(8)  | 26.0(3) |
| C00X | 4069.1(8)  | 6261.0(14)  | 4441.1(9)  | 26.4(3) |
| C00Y | 5871.0(9)  | 5388.7(15)  | 7252.7(9)  | 30.1(3) |
| C00Z | 3361.5(10) | 5205.2(16)  | 8682.3(9)  | 32.5(3) |
| C010 | 5088.1(10) | 5638.8(15)  | 6698.9(9)  | 31.6(3) |
| C011 | 2348.0(9)  | 3504.3(18)  | 8289.0(9)  | 33.8(3) |
| C012 | 4797.0(10) | -654.9(15)  | 7331.8(10) | 33.0(3) |
| C013 | 4814.3(9)  | 6892.0(17)  | 4651.3(10) | 32.4(3) |
| C014 | 2695.5(10) | 4602.4(17)  | 8721.4(9)  | 33.3(3) |
| C015 | 4085.3(10) | 731.8(15)   | 8118.8(8)  | 28.7(3) |
| C016 | 4403.3(11) | -520.2(17)  | 8360.5(9)  | 36.1(4) |
| C017 | 4763.8(9)  | -1200.1(15) | 7973.6(10) | 34.3(3) |

**Table S3.** Bond Lengths for 1.

| <b>Atom</b> | <b>Atom</b> | <b>Length / Å</b> |
|-------------|-------------|-------------------|
| Mn01        | C102        | 2.3301(4)         |
| Mn01        | C104        | 2.3264(4)         |
| Mn01        | O006        | 2.0491(9)         |
| Mn01        | O007        | 2.0189(9)         |
| P003        | O006        | 1.5027(9)         |
| P003        | C008        | 1.7993(13)        |
| P003        | C009        | 1.7972(12)        |
| P003        | C00A        | 1.7910(12)        |
| P005        | O007        | 1.5036(10)        |
| P005        | C00B        | 1.7927(13)        |
| P005        | C00G        | 1.7958(13)        |
| P005        | C00N        | 1.7964(14)        |
| C008        | C00E        | 1.3947(17)        |
| C008        | C00H        | 1.3977(18)        |
| C009        | C00F        | 1.3921(18)        |
| C009        | C00X        | 1.4000(18)        |
| C00A        | C00C        | 1.4003(17)        |
| C00A        | C00D        | 1.3989(17)        |
| C00B        | C00J        | 1.3938(19)        |
| C00B        | C00Q        | 1.395(2)          |
| C00C        | C00V        | 1.3854(18)        |
| C00D        | C00K        | 1.3868(18)        |
| C00E        | C00S        | 1.3883(19)        |
| C00F        | C00U        | 1.3920(18)        |
| C00G        | C00T        | 1.3944(19)        |
| C00G        | C015        | 1.3909(19)        |
| C00H        | C00P        | 1.3921(19)        |
| C00I        | C00K        | 1.383(2)          |
| C00I        | C00V        | 1.389(2)          |
| C00J        | C00Z        | 1.393(2)          |
| C00L        | C00N        | 1.3952(18)        |
| C00L        | C00O        | 1.385(2)          |
| C00M        | C00N        | 1.3961(18)        |

|      |      |            |
|------|------|------------|
| C00M | C010 | 1.390(2)   |
| C00O | C00Y | 1.385(2)   |
| C00P | C00W | 1.384(2)   |
| C00Q | C011 | 1.391(2)   |
| C00R | C00U | 1.381(2)   |
| C00R | C013 | 1.384(2)   |
| C00S | C00W | 1.387(2)   |
| C00T | C012 | 1.386(2)   |
| C00X | C013 | 1.3866(19) |
| C00Y | C010 | 1.382(2)   |
| C00Z | C014 | 1.384(2)   |
| C011 | C014 | 1.375(2)   |
| C012 | C017 | 1.388(2)   |
| C015 | C016 | 1.393(2)   |
| C016 | C017 | 1.375(2)   |

**Table S4.** Bond Angles for **1**.

| Atom | Atom | Atom | Angle / °   |
|------|------|------|-------------|
| Cl04 | Mn01 | Cl02 | 112.878(14) |
| O006 | Mn01 | Cl02 | 109.55(3)   |
| O006 | Mn01 | Cl04 | 108.04(3)   |
| O007 | Mn01 | Cl02 | 110.13(3)   |
| O007 | Mn01 | Cl04 | 113.79(3)   |
| O007 | Mn01 | O006 | 101.80(4)   |
| O006 | P003 | C008 | 110.80(6)   |
| O006 | P003 | C009 | 110.95(5)   |
| O006 | P003 | C00A | 111.29(6)   |
| C009 | P003 | C008 | 106.01(6)   |
| C00A | P003 | C008 | 108.59(6)   |
| C00A | P003 | C009 | 109.03(6)   |
| O007 | P005 | C00B | 110.73(6)   |
| O007 | P005 | C00G | 111.86(6)   |
| O007 | P005 | C00N | 110.92(6)   |
| C00B | P005 | C00G | 108.23(6)   |
| C00B | P005 | C00N | 108.40(6)   |
| C00G | P005 | C00N | 106.53(6)   |
| P003 | O006 | Mn01 | 155.54(6)   |
| P005 | O007 | Mn01 | 163.62(7)   |
| C00E | C008 | P003 | 120.92(10)  |
| C00E | C008 | C00H | 119.25(12)  |
| C00H | C008 | P003 | 119.82(10)  |
| C00F | C009 | P003 | 122.80(9)   |
| C00F | C009 | C00X | 119.36(12)  |
| C00X | C009 | P003 | 117.75(10)  |
| C00C | C00A | P003 | 122.40(9)   |
| C00D | C00A | P003 | 118.07(10)  |
| C00D | C00A | C00C | 119.48(11)  |
| C00J | C00B | P005 | 122.00(11)  |
| C00J | C00B | C00Q | 119.78(13)  |
| C00Q | C00B | P005 | 118.21(11)  |
| C00V | C00C | C00A | 120.18(12)  |
| C00K | C00D | C00A | 119.79(12)  |
| C00S | C00E | C008 | 120.59(12)  |
| C00U | C00F | C009 | 119.81(12)  |
| C00T | C00G | P005 | 118.05(10)  |
| C015 | C00G | P005 | 122.46(10)  |
| C015 | C00G | C00T | 119.50(13)  |
| C00P | C00H | C008 | 119.75(12)  |
| C00K | C00I | C00V | 120.38(12)  |
| C00Z | C00J | C00B | 119.66(14)  |

|      |      |      |            |
|------|------|------|------------|
| C00I | C00K | C00D | 120.32(12) |
| C00O | C00L | C00N | 120.03(13) |
| C010 | C00M | C00N | 119.69(13) |
| C00L | C00N | P005 | 121.12(10) |
| C00L | C00N | C00M | 119.73(12) |
| C00M | C00N | P005 | 119.15(10) |
| C00Y | C00O | C00L | 120.02(13) |
| C00W | C00P | C00H | 120.56(13) |
| C011 | C00Q | C00B | 119.80(15) |
| C00U | C00R | C013 | 119.95(13) |
| C00W | C00S | C00E | 119.90(13) |
| C012 | C00T | C00G | 119.99(14) |
| C00R | C00U | C00F | 120.53(13) |
| C00C | C00V | C00I | 119.83(13) |
| C00P | C00W | C00S | 119.93(13) |
| C013 | C00X | C009 | 120.16(13) |
| C010 | C00Y | C00O | 120.37(14) |
| C014 | C00Z | C00J | 120.11(15) |
| C00Y | C010 | C00M | 120.15(14) |
| C014 | C011 | C00Q | 120.23(15) |
| C00T | C012 | C017 | 120.10(15) |
| C00R | C013 | C00X | 120.17(13) |
| C011 | C014 | C00Z | 120.41(14) |
| C00G | C015 | C016 | 120.11(14) |
| C017 | C016 | C015 | 120.05(15) |
| C016 | C017 | C012 | 120.24(14) |

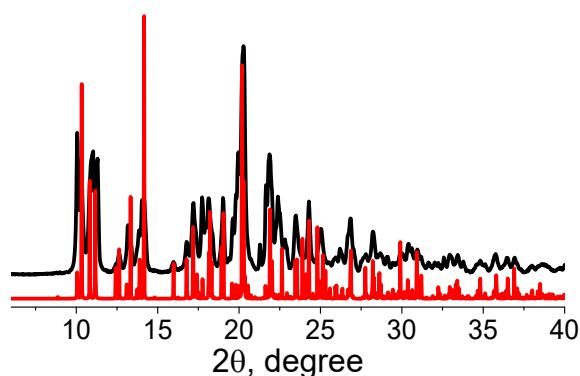

**Fig. S1.** Comparison of experimental (black) PXRD patterns of **1** with the diffraction pattern, simulated for the crystal structure (red).

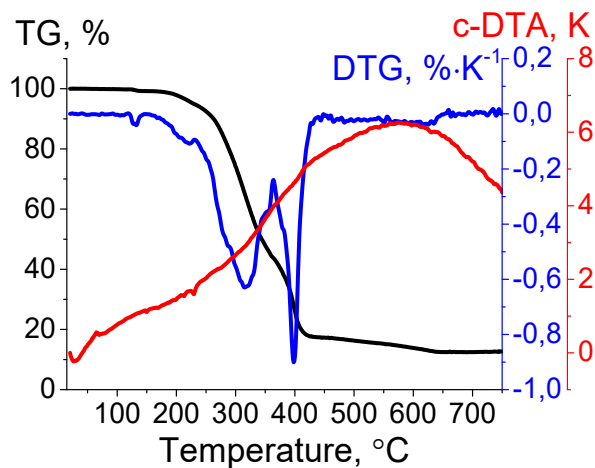

**Fig. S2.** TG, DTG, and c-DTA curves of **1**.

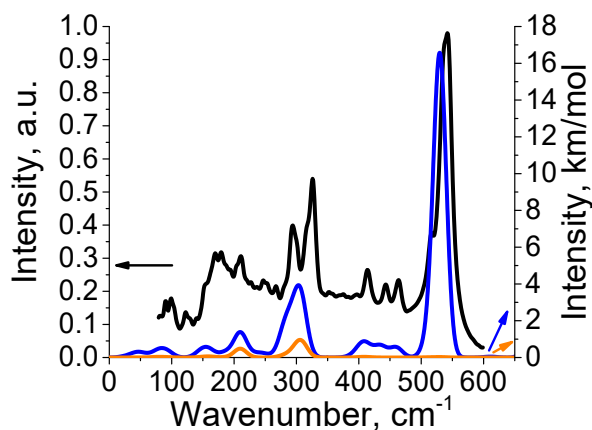

**Fig. S3.** Experimental (black) IR spectra of **1** with the calculated IR vibrations (blue) for the  $[(\text{Ph}_3\text{PO})_2\text{MnCl}_2]$  molecule and partial contribution of the  $\{\text{MnCl}_2\text{O}_2\}$  vibrations (orange).

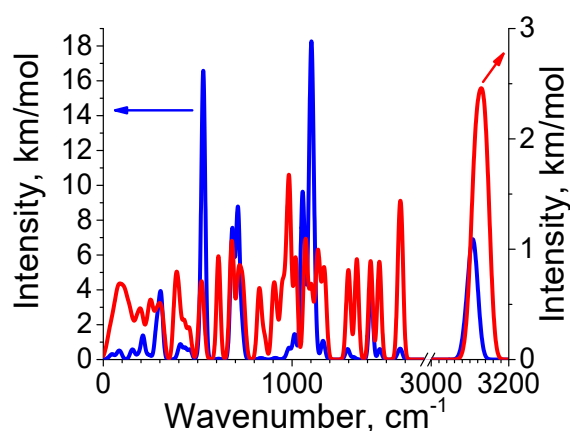

**Fig. S4.** Calculated IR vibrations for the  $[(\text{Ph}_3\text{PO})_2\text{MnCl}_2]$  molecule (blue) and phonons for the  $[(\text{Ph}_3\text{PO})_2\text{MnCl}_2]$  crystal (red).

**Table S5.** Calculated zero-field splitting parameters of **1**.

|                                                                                                    | <b>1DFT</b>  |
|----------------------------------------------------------------------------------------------------|--------------|
| $D_{tot}$ [MHz]                                                                                    | 5403         |
| $E_{tot}$ [MHz]                                                                                    | 1492         |
| $D_{SS}$ [MHz]                                                                                     | -752         |
| $E_{SS}$ [MHz]                                                                                     | -148         |
| $D_{SO}$ [MHz]                                                                                     | 5384         |
| $E_{SO}$ [MHz]                                                                                     | 1551         |
| $D_{\alpha\rightarrow\beta}$ [MHz]                                                                 | -2493        |
| $E_{\alpha\rightarrow\beta}$ [MHz]                                                                 | -861         |
| $D_{\alpha\rightarrow\alpha}$ [MHz] ( $D_{\alpha\rightarrow\alpha} / D_{\alpha\rightarrow\beta}$ ) | 1009 (-0.40) |
| $E_{\alpha\rightarrow\alpha}$ [MHz] ( $E_{\alpha\rightarrow\alpha} / E_{\alpha\rightarrow\beta}$ ) | 252 (-0.30)  |



|                                                                                                        |              |
|--------------------------------------------------------------------------------------------------------|--------------|
| $D_{\beta \rightarrow \beta}$ [MHz] ( $D_{\beta \rightarrow \beta} / D_{\alpha \rightarrow \beta}$ )   | 2258 (-0.91) |
| $E_{\beta \rightarrow \beta}$ [MHz] ( $E_{\beta \rightarrow \beta} / E_{\alpha \rightarrow \beta}$ )   | 736 (-0.85)  |
| $D_{\beta \rightarrow \alpha}$ [MHz] ( $D_{\beta \rightarrow \alpha} / D_{\alpha \rightarrow \beta}$ ) | 481 (-0.19)  |
| $E_{\beta \rightarrow \alpha}$ [MHz] ( $E_{\beta \rightarrow \alpha} / E_{\alpha \rightarrow \beta}$ ) | 89 (-0.10)   |

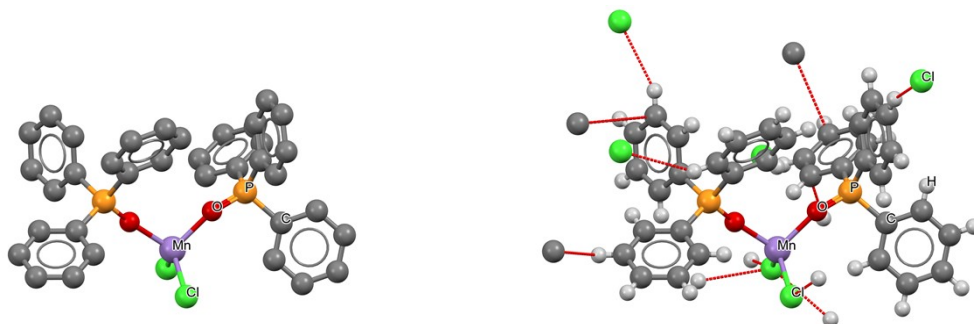

**Fig. S5.** Molecule structure of **1**. Molecule with omitted hydrogen for clarity (left) and molecule with shown short contacts by dotted red lines (right).

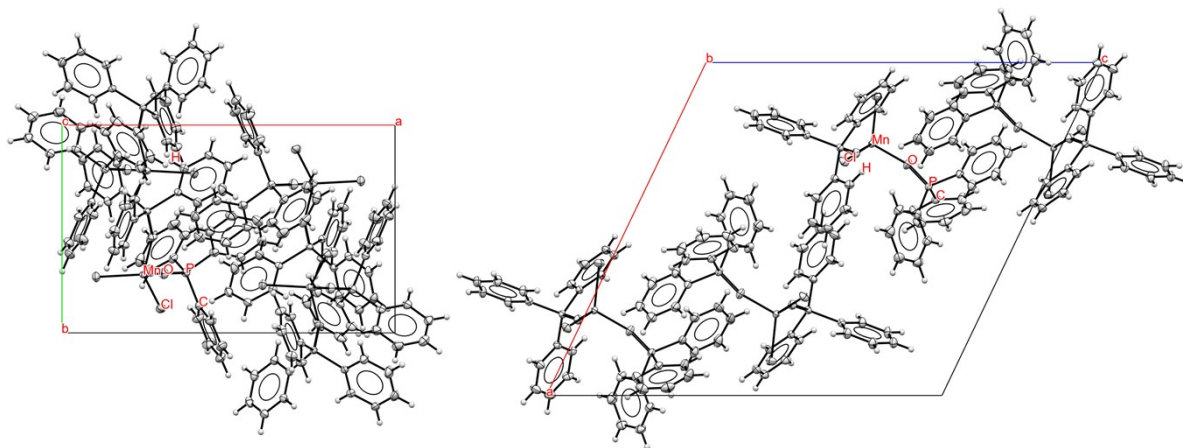

**Fig. S6.** ORTEP diagram of **1** crystal structure along axis **c** (left) and axis **b** (right).

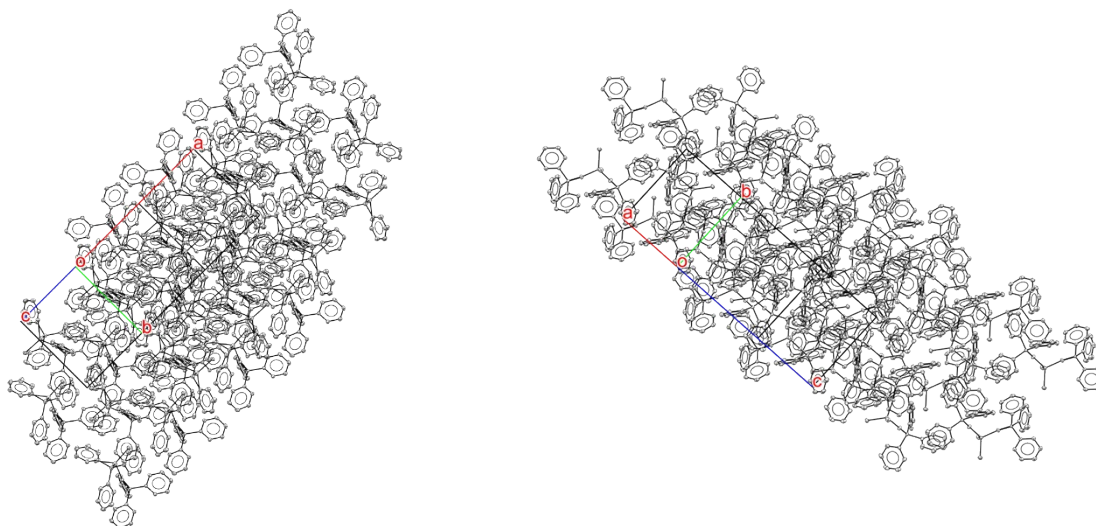

**Fig. S7.** ORTEP diagram of **1** crystal structure along (001) (left) and (100) (right) directions. Hydrogen atoms are omitted.

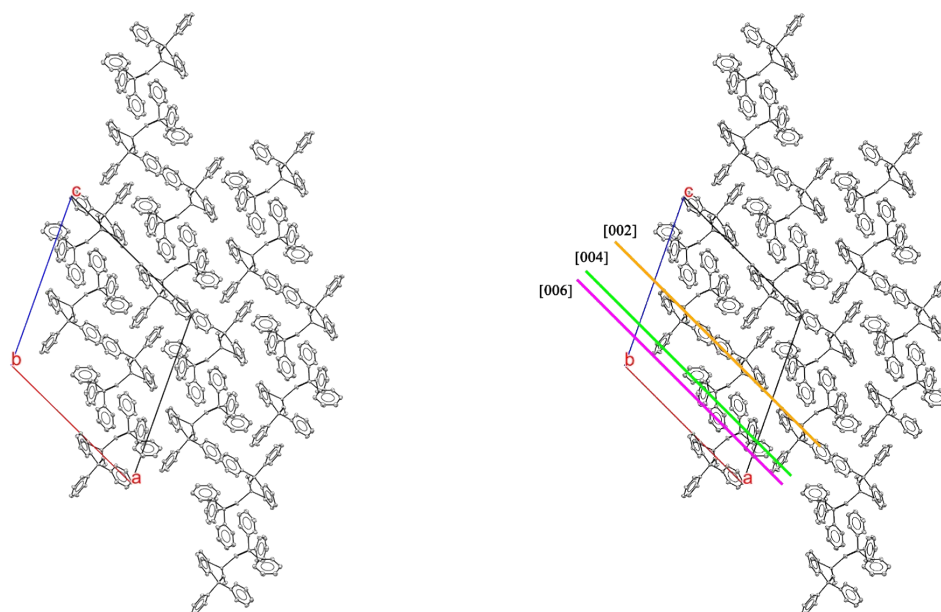

**Fig. S8.** ORTEP diagram of **1** crystal structure along (010) direction (left) with the selected [002], [004], and [006] planes (right). Hydrogen atoms are omitted.

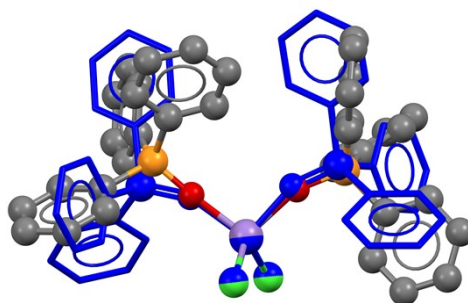

**Fig. S9.** Comparison of the molecule structures of **1** ( $P2_1/n$ , ball-and-stick, colored) and **1nl** ( $Fdd2$ , ball-and-stick and capped, blue) by overlaying the two Cl atoms and Mn atom.

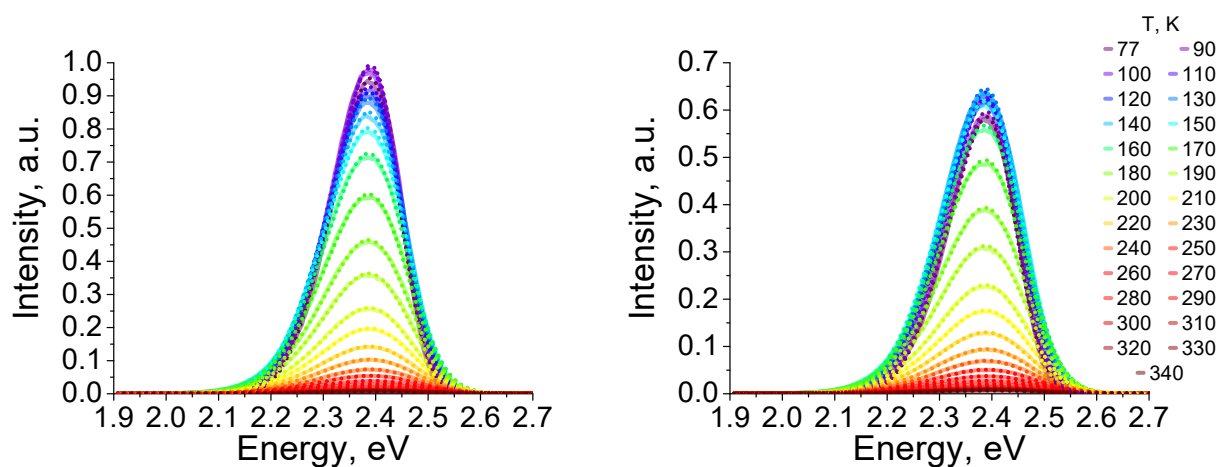

**Fig. S10.** Temperature dependence of the photoluminescence spectra ( $\lambda_{\text{Ex}} = 275$  nm (left) and  $\lambda_{\text{Ex}} = 280$  nm (right)) of **1**. Experimental (solid), two Gauss fitting (dot). Adjusted  $R$ -Squared values for global parameters fitting are 0.999. Adjusted  $R$ -Squared values for individual parameters fitting are 0.999 for temperatures 77 K – 270 K, 0.998 for temperatures 280 K – 290 K, and 0.997 for temperatures 300 K – 340 K.

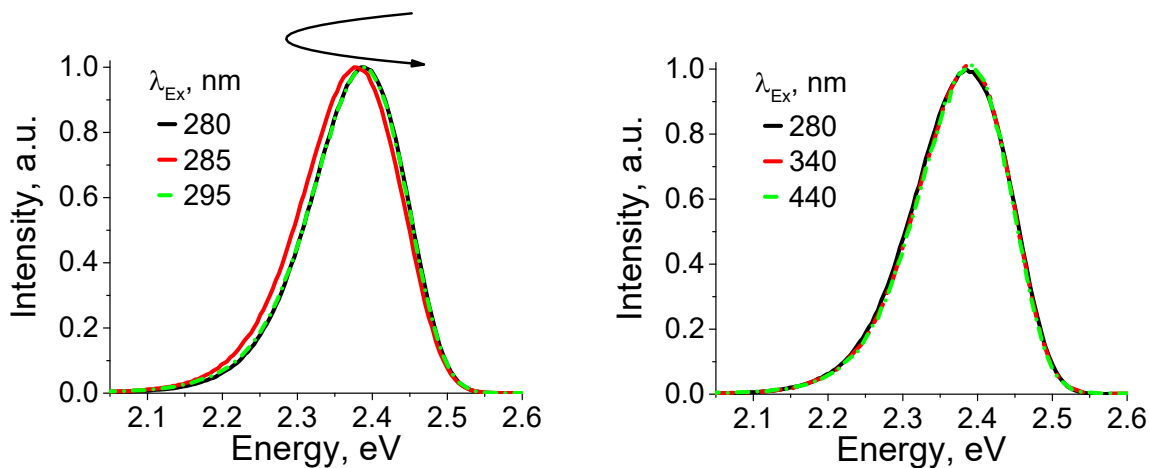

**Fig. S11.** Normalized photoluminescence spectra ( $\lambda_{\text{EX}} = 280$  nm (black),  $\lambda_{\text{EX}} = 285$  nm (red), and  $\lambda_{\text{EX}} = 295$  nm (green)) (left) and ( $\lambda_{\text{EX}} = 280$  nm (black),  $\lambda_{\text{EX}} = 340$  nm (red), and  $\lambda_{\text{EX}} = 440$  nm (green)) (right) of **1** at 77 K.

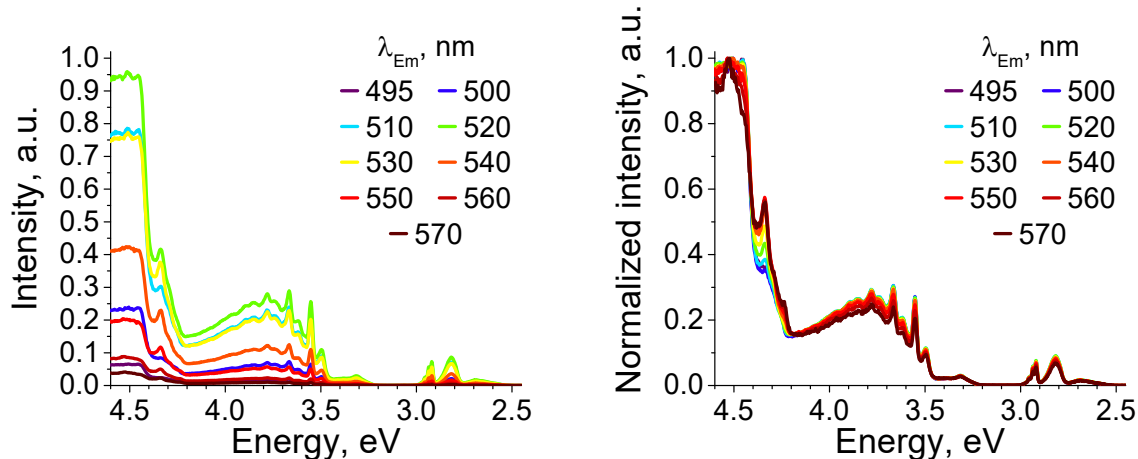

**Fig. S12.** Luminescence excitation spectra (left) and normalized (right) of **1** at 77 K.

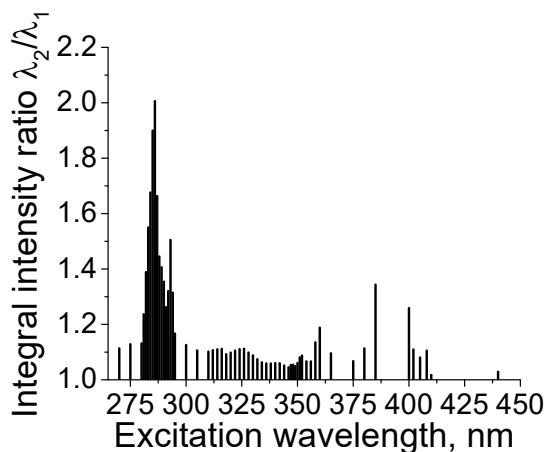

**Fig. S13.** Wavelength-excitation dependence of the integral intensity ratio  $\lambda_2/\lambda_1$  ( $\lambda_1 = 2.41$  eV,  $\lambda_2 = 2.35$  eV) of the two Gauss fitted photoluminescence spectra of **1** at 77 K.

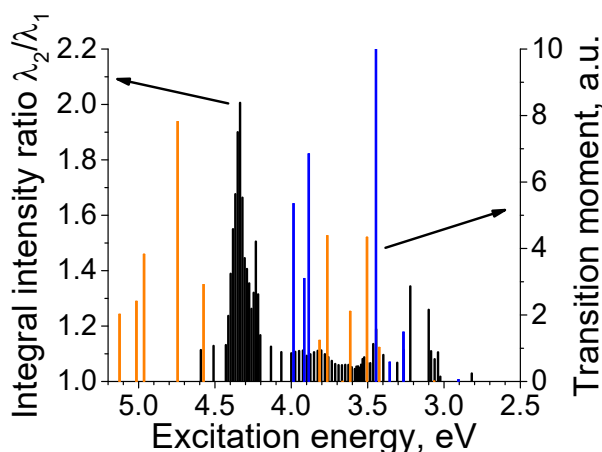

**Fig. S14.** Comparison of the wavelength-excitation dependence of the integral intensity ratio  $\lambda_2/\lambda_1$  of **1** (black) at 77 K and calculated spin-flip transition energies for dimer  $\{(\text{Ph}_3\text{PO})_2\text{MnCl}_2\}_2$  with  $C_i$  symmetry (orange – metal-and-halide to metal transition, blue - metal-and-halide to ligand transition).

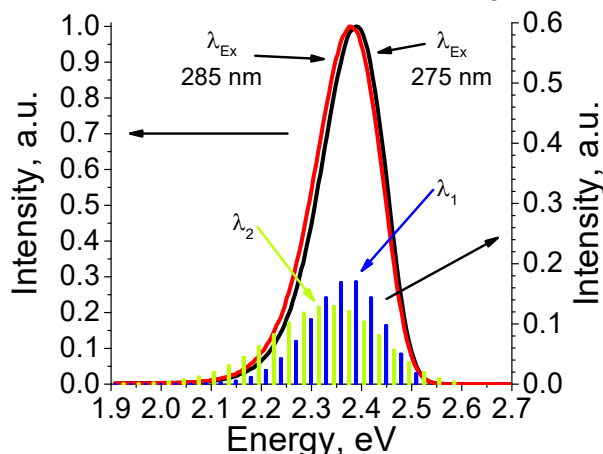

**Fig. S15.** Comparison of the experimental luminescence spectra of **1** ( $\lambda_{\text{Ex}} = 275$  nm (black) and  $\lambda_{\text{Ex}} = 285$  nm (red)) at 77 K with the reconstructed luminescence bands ( $\lambda_1$  band (blue) and  $\lambda_2$  band (green)). The reconstruction of the luminescence bands were carried out according to [35].

The energy dependence of the emission band intensity can be approximated by the following expression:

$$I = \frac{e^{-S} S^p}{p!} \left( 1 + S^2 \frac{e^{-E_p/kT}}{p+1} \right), \quad p = \frac{E_0 - E}{E_p}$$

where  $E_0$  is the zero phonon line energy,  $E_p$  is the phonon energy,  $S$  is the Huang–Rhys factor. The  $E_p \approx 30$  meV,  $S_1 \approx 6$ , and  $E_0 \approx 2.54$  eV values were chosen for the  $\lambda_1$  band and  $E_p \approx 30$  meV,  $S_1 \approx 13$ , and  $E_0 \approx 2.71$  eV values were chosen for the  $\lambda_2$  band.

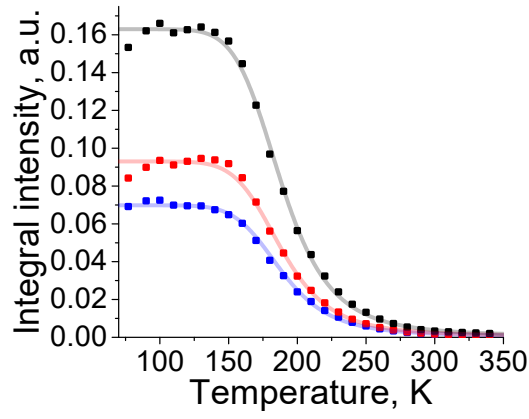

**Fig. S16.** Temperature dependences of the integral intensities ( $\lambda_1 = 2.41$  eV (blue),  $\lambda_2 = 2.35$  eV (red), and  $\lambda_1 + \lambda_2$ (black)) of the two Gauss fitted (dot) photoluminescence spectra ( $\lambda_{\text{ex}} = 275$  nm) of **1**. Approximation (solid) by the equation  $I(T) = I_0 / (1 + C * \exp(-\frac{\Delta E}{T}))$  (where  $I_0$  is the intensity at  $T = 0$  K,  $C$  is the dimensionless parameter corresponding to the ratio between the non-radiative and radiative probabilities, and  $\Delta E$  is the activation energy for the thermal quenching process which is equal to the  $\Delta E = 1970$  K ( $1370$  cm $^{-1}$ )).

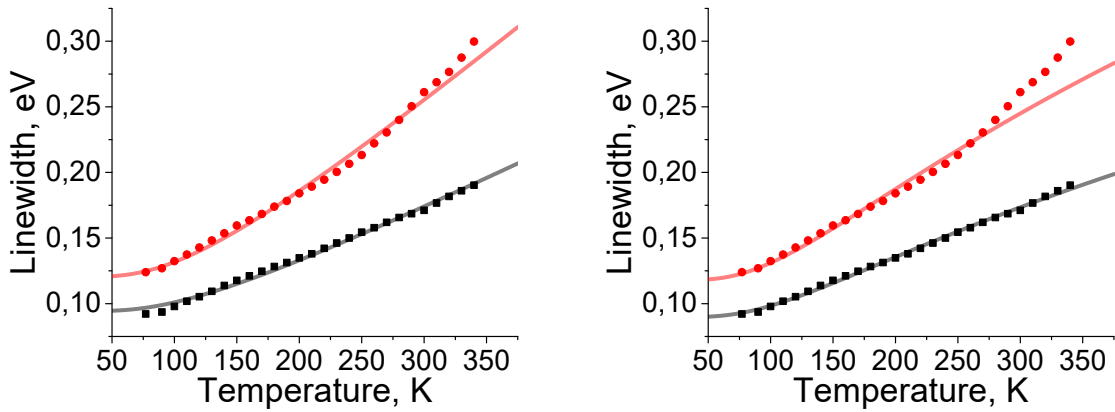

**Fig. S17.** Temperature dependences of the linewidth of the components of the photoluminescence spectrum of **1** ( $\lambda_1 = 2.41$  eV (black) and  $\lambda_2 = 2.35$  eV (red)) fitted by  $w = \Gamma_0 + \Gamma_1 * (\exp(\frac{E_p}{k_B * T}) - 1)^{-1}$  (left) and by  $w = 2 * \sqrt{S * E_p} * \sqrt{\coth(\frac{E_p}{2 * k_B * T})} + w_0$  (right). More details see in the article.

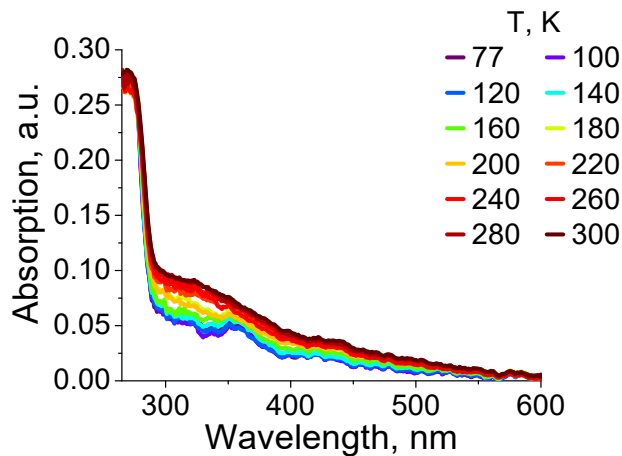

**Fig. S18.** Temperature dependence of the absorption of **1**.

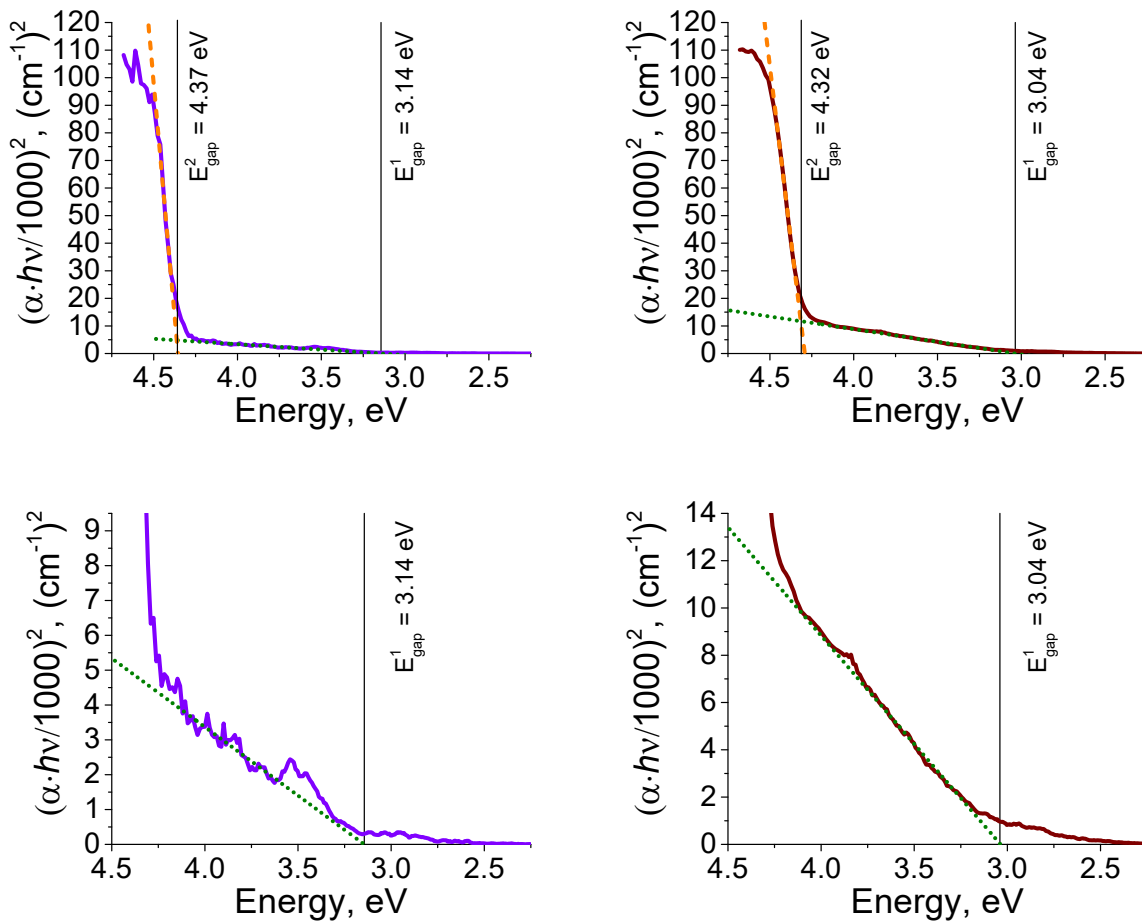

Fig. S19. Tauc plots for **1** at 77 K (left) and 300 K (right).

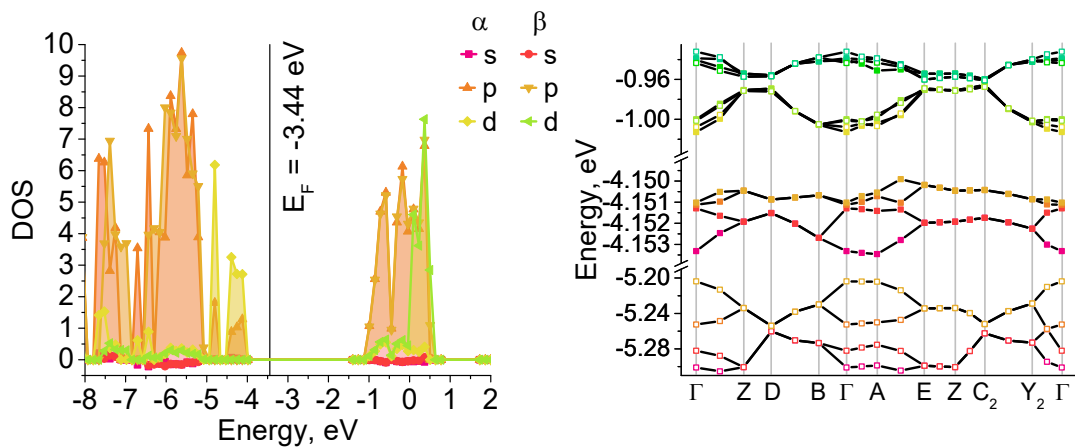

Fig. S20. Calculated DOS (left) and bandpaths (right) (spin-up (■) and spin-down (□)) for **1**.

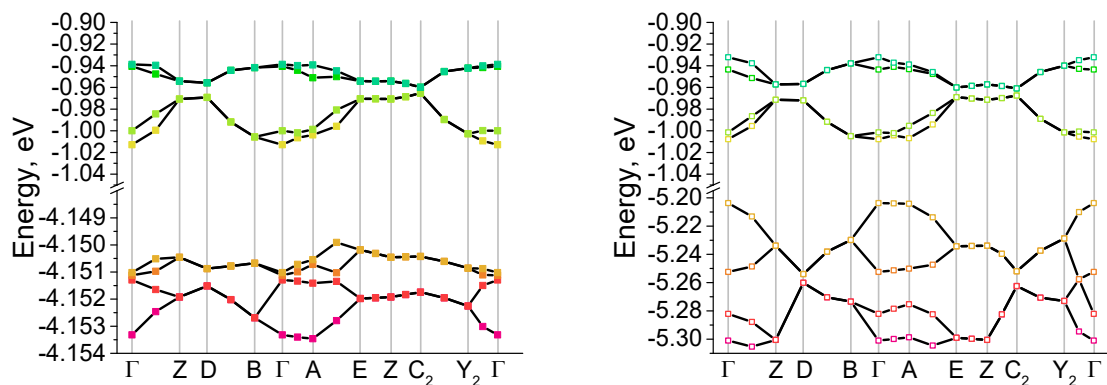

**Fig. S21.** Calculated spin-up (left) and spin-down (right) bandpaths for **1**.

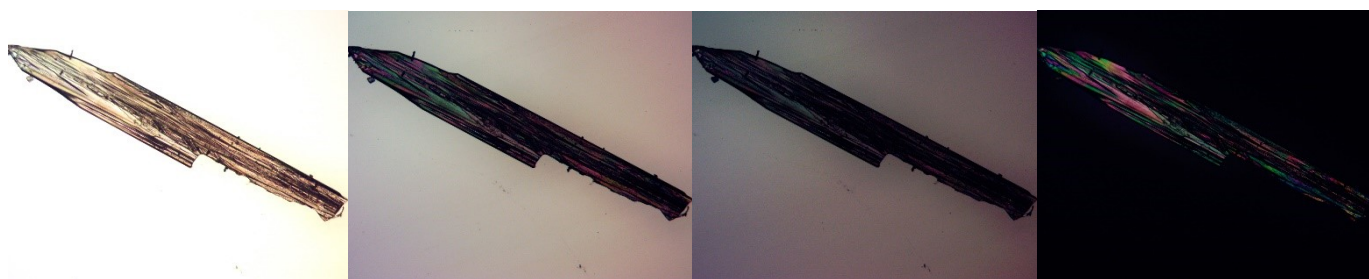

**Fig. S22.** Photographs of single-crystal of **1** under cross-polarized light illumination at different angle between polarizers ( $0^\circ$ ,  $30^\circ$ ,  $60^\circ$ ,  $90^\circ$ )

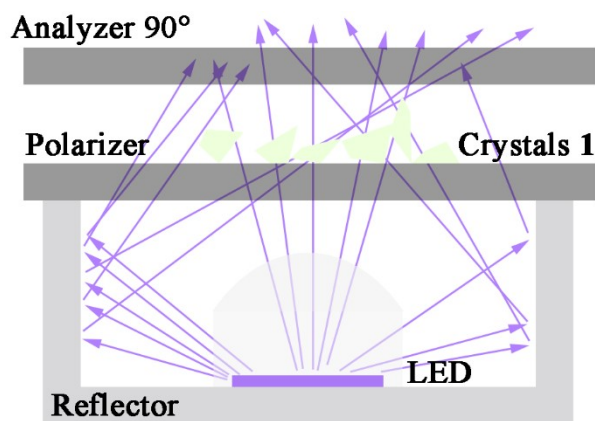

**Fig. S23.** Scheme of the fabricated LED with **1** under polarized light.

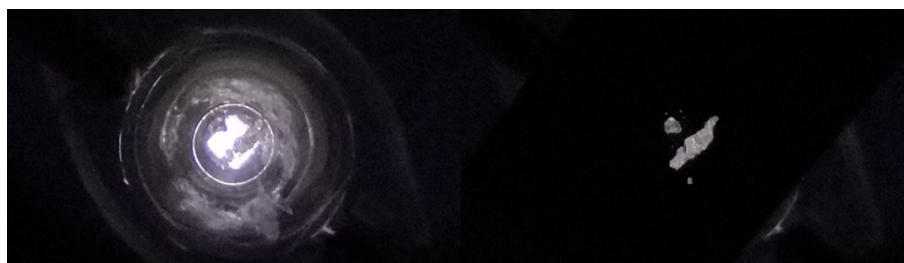

**Fig. S24.** Photographs of powder **1** under cross-polarized light illumination with  $0^\circ$  (left) and  $90^\circ$  (right) angle between polarizers. The LED with  $\lambda_{\text{max}} = 395\text{-}400$  nm was used at 30 mW power.

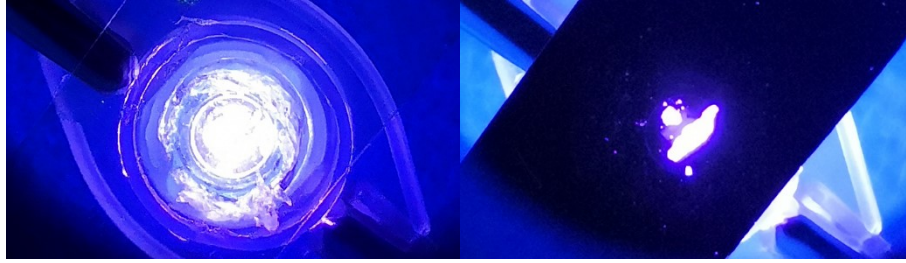

**Fig. S25.** Photographs of powder **1** under cross-polarized light illumination with 0° (left) and 90° (right) angle between polarizers. The LED with  $\lambda_{\text{max}} = 395\text{-}400$  nm was used at 90 mW power.

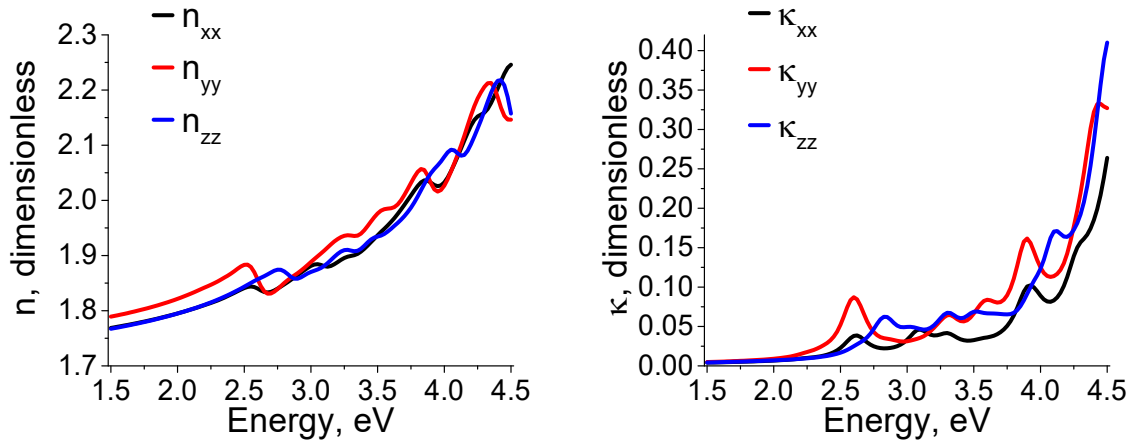

**Fig. S26.** Calculated energy dependence of the refractive tensor  $n = n + i * \kappa$  of the  $\{(\text{Ph}_3\text{PO})_2\text{ZnCl}_2\}$  obtained from the energy dependence of the polarizability tensor  $\alpha$  using the Lorentz-Lorenz equation  $\frac{n^2 - 1}{n^2 + 2} = \frac{4\pi Z}{3V} \alpha$ , where  $Z$  is a number of molecule in the unit cell,  $V$  is a unit cell volume.

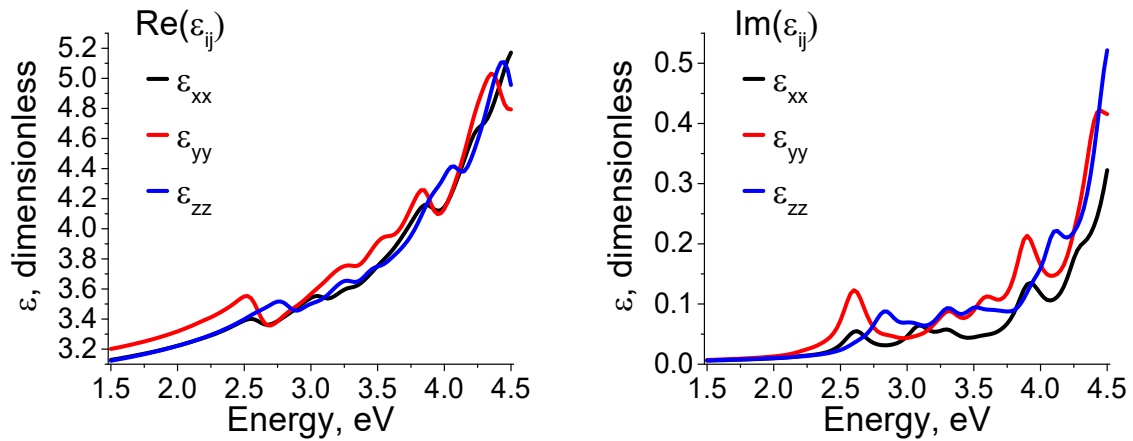

**Fig. S27.** Calculated energy dependence of the relative permittivity  $\epsilon = \text{Re}(\epsilon) + i * \text{Im}(\epsilon)$  of the  $\{(\text{Ph}_3\text{PO})_2\text{ZnCl}_2\}$  obtained from the energy dependence of the polarizability tensor. ( $\text{Re}(\epsilon) = n^2 - \kappa^2$ ,  $\text{Im}(\epsilon) = 2 * n * \kappa$ ).



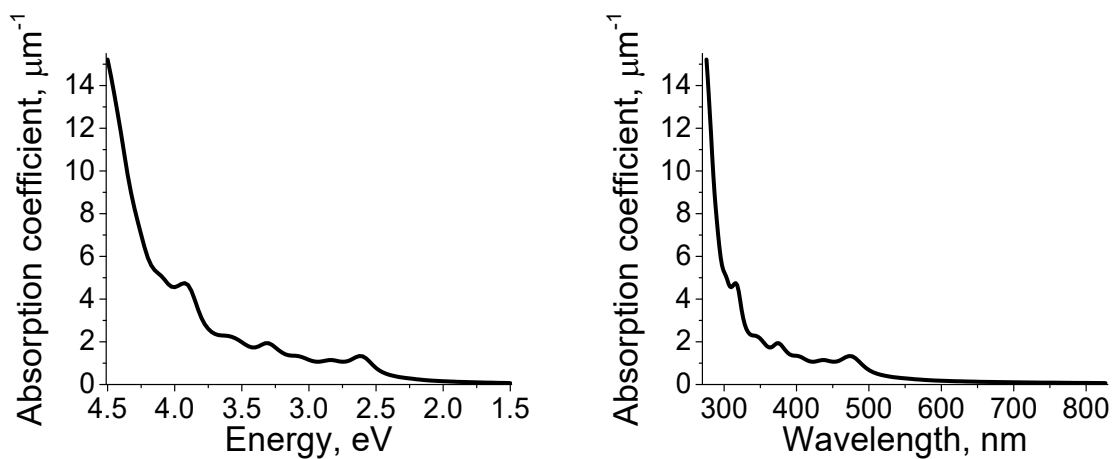

**Fig. S28.** Calculated energy dependence of the absorption coefficient  $absorption(\lambda) = 4 * \pi * \langle \kappa(\lambda) \rangle_{ij} / \lambda$ , where  $\langle \kappa(\lambda) \rangle_{ij}$  is a spatially averaged absorption coefficient at wavelength  $\lambda$  of the  $\{(Ph_3PO)_2ZnCl_2\}$ .

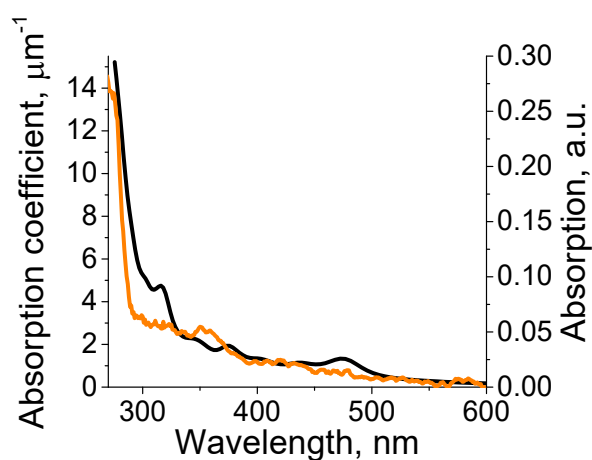

**Fig. S29.** Comparison of the absorption (black - calculated coefficient of the  $\{(Ph_3PO)_2ZnCl_2\}$ , orange - experimental absorption of **1** at 77 K).

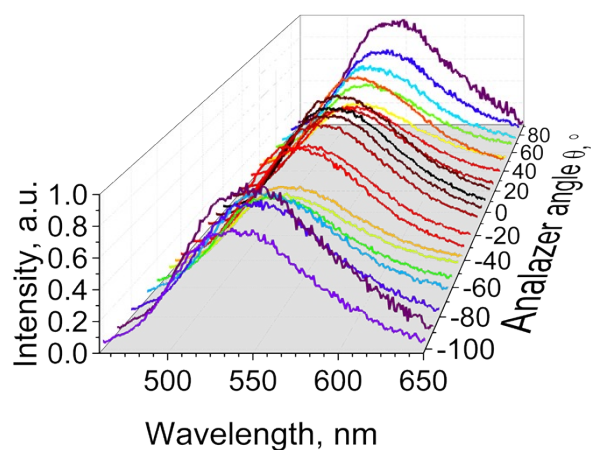

**Fig. S30.** Angular dependence of the polarized luminescence spectra of the single crystal **1**.

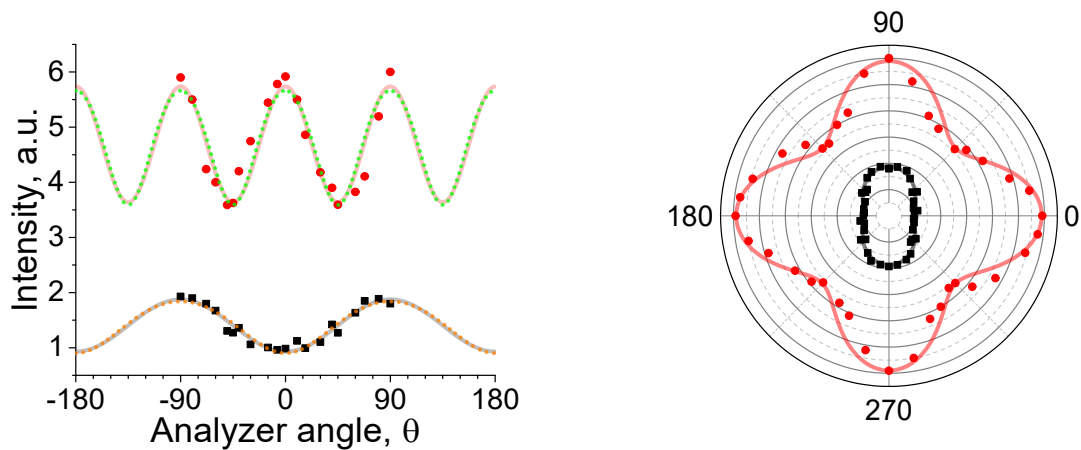

**Fig. S31.** Angular dependences of the integral intensities ( $\lambda_{\text{Ex}} = 440 \text{ nm}$ ) of the  $\lambda_1$  (black) and  $\lambda_2$  (red) bands obtained from the two Gauss approximation of the polarized luminescence spectra of the single crystal **1** (at 300 K).

Comparison of the fitting by  $I(\theta) = A * \cos^2(m * \theta + \varphi) + A_0$  (solid) and  $I(\theta) = A * (3 * \cos^2(m * \theta + \varphi) - 1) / (\cos^2(m * \theta + \varphi) + 3) + A_0$  (dot). Adjusted  $R$ -Squared value of the two Gauss approximation fitting is 0.997. Adjusted  $R$ -Squared value of the angular dependence fitting is 0.955.

The experimental degree of polarization for  $\lambda_1$  and  $\lambda_2$  bands are  $P_1 = 0.45$  and  $P_2 = 0.25$  where  $P_i = \frac{A_{\text{max}} - A_{\text{min}}}{A_{\text{max}} + A_{\text{min}}}$ .

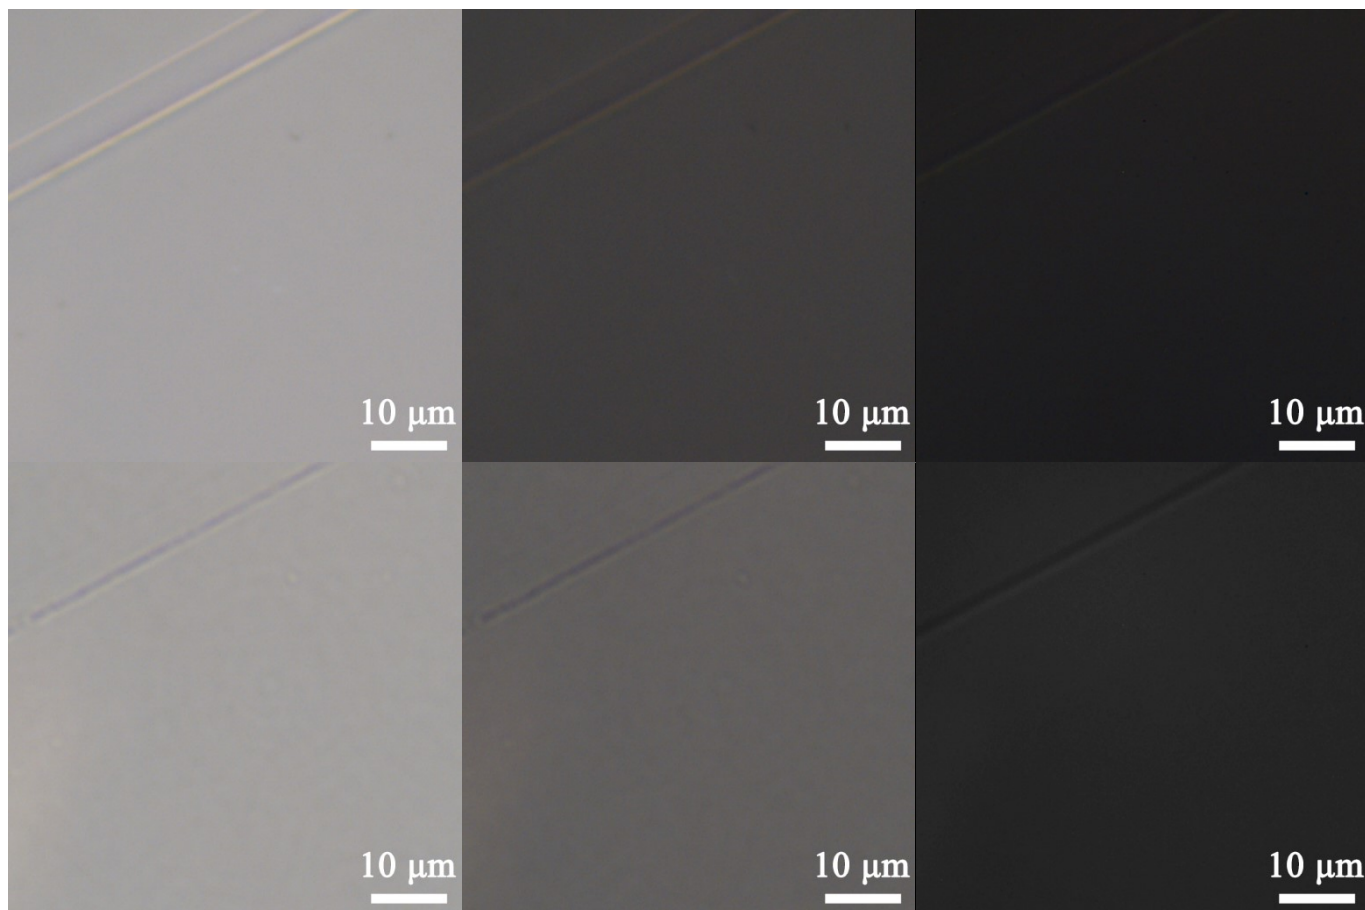

**Fig. S32.** Photographs of the film of **1** on the quartz substrate obtained by spin-coating method under white-light illumination (left), under cross-polarized white-light illumination at angle polarizes  $0^\circ$  (center) and  $90^\circ$  (right) in reflection mode (top) and in transmission mode (bottom).

The analysis of the film thickness  $h$  according to the absorption data and quantum chemical-calculations gives the value  $h \sim 200 \text{ nm}$  in order of magnitude. The thickness is estimated using the formula  $h = \frac{\text{absorption}(\lambda) * \lambda}{4 * \pi * \langle \kappa(\lambda) \rangle_{ij}}$ , where  $\text{absorption}(\lambda)$  is an experimentally obtained absorption value of

the film at wavelength  $\lambda$ ,  $\langle \kappa(\lambda) \rangle_{ij}$  is a spatially averaged absorption coefficient at wavelength  $\lambda$  obtained from quantum chemical-calculations.

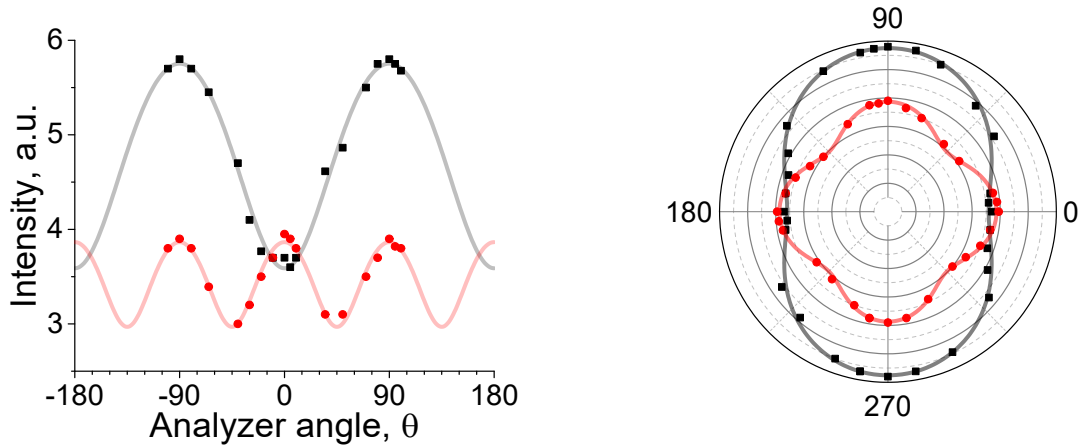

**Fig. S33.** Angular dependences of the integral intensities ( $\lambda_{\text{Ex}} = 440 \text{ nm}$ ) of the  $\lambda_1$  (black) and  $\lambda_2$  (red) bands obtained from the two Gauss approximation of the polarized luminescence spectra of the **1** coated on the glass substrate (at 300 K). Adjusted  $R$ -Squared value is 0.958.

The experimental degree of polarization for  $\lambda_1$  and  $\lambda_2$  bands are  $P_1 = 0.24$  and  $P_2 = 0.14$  where  $P_i = \frac{A_{\text{max}} - A_{\text{min}}}{A_{\text{max}} + A_{\text{min}}}$ .

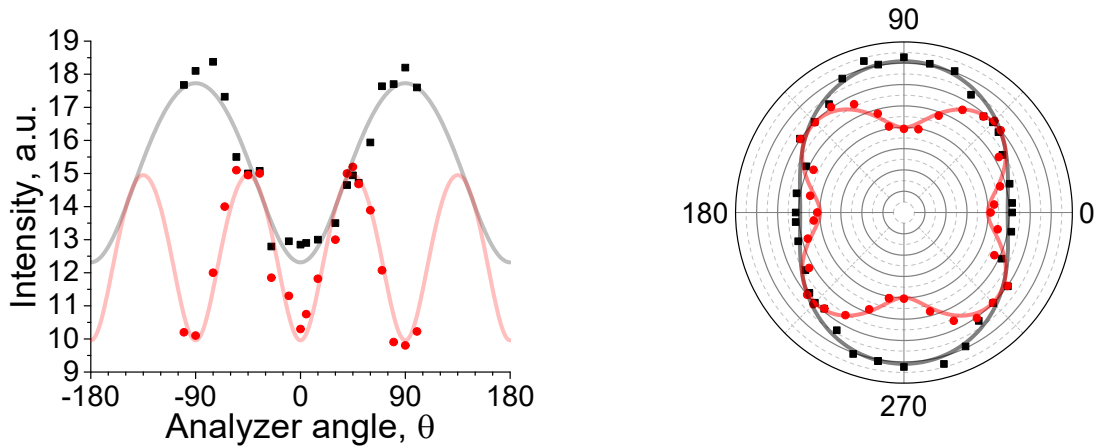

**Fig. S34.** Angular dependences of the integral intensities ( $\lambda_{\text{Ex}} = 440 \text{ nm}$ ) of the  $\lambda_1$  (black) and  $\lambda_2$  (red) bands obtained from the two Gauss approximation of the polarized luminescence spectra of the **1** coated on the glass substrate (at 77 K). Adjusted  $R$ -Squared value is 0.981.

The experimental degree of polarization for  $\lambda_1$  and  $\lambda_2$  bands are  $P_1 = 0.18$  and  $P_2 = 0.22$  where  $P_i = \frac{A_{\text{max}} - A_{\text{min}}}{A_{\text{max}} + A_{\text{min}}}$ .

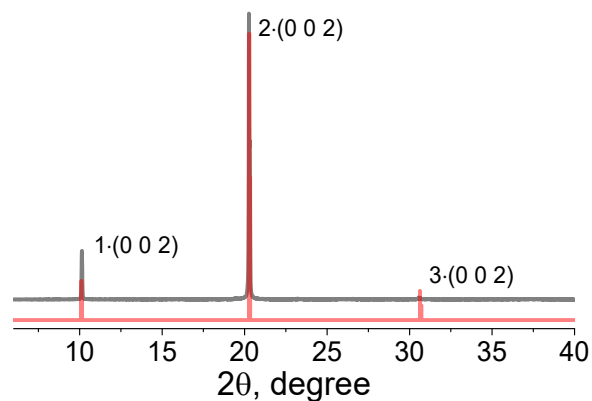

**Fig. S35.** Comparison of experimental (black) PXRD patterns of **1** with the diffraction pattern ((00 $l$ ) plane), simulated for the crystal structure (red).

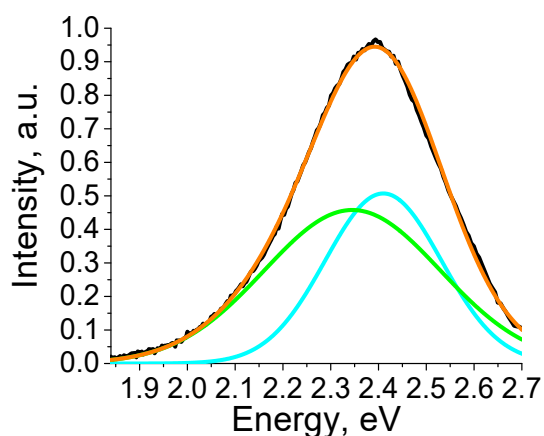

**Fig. S36.** Photoluminescence spectrum ( $\lambda_{\text{Ex}} = 300$  nm) of the film of **1** on the quartz substrate obtained by spin-coating method. Experimental (black), two Gauss fitting with maxima  $\lambda_1 = 2.41$  eV (cyan) and  $\lambda_2 = 2.35$  eV (green), superposition of the two fitting Gauss functions (orange).

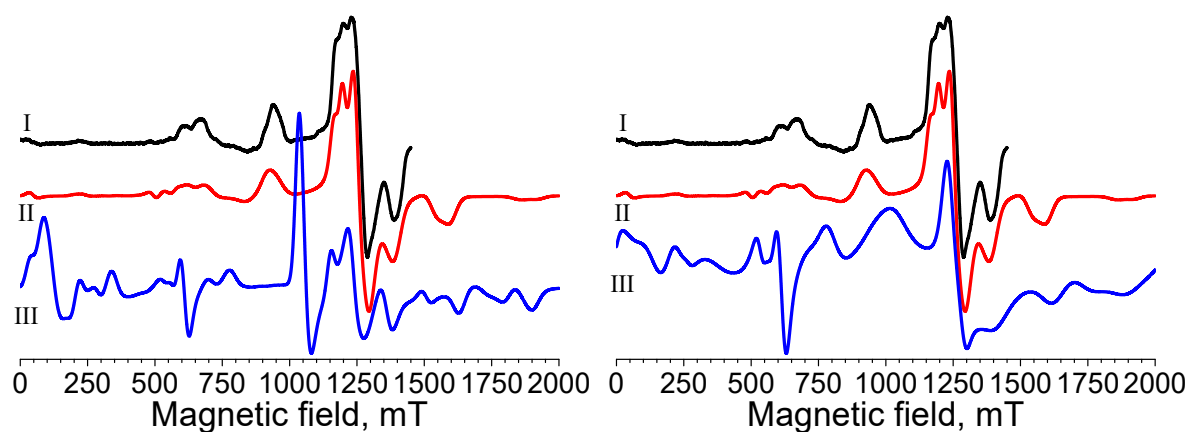

**Fig. S37.** Q-band powder EPR spectra at 300 K (black line – experimental for **1**, red line – the best fit of the experimental data of **1**, blue line –fitting of the literature data for **1nl** [36]) with the equal line width values for II and III (left) and with different line width values for II and III (right).

36 Dowsing, R. D., Gibson, J. F., Goodgame, D. M. L., Goodgame, M., Hayward, P. J., *Journal of the Chemical Society A: Inorganic, Physical, and Theoretical Chemistry* (1969), 1242, <http://doi.org/10.1039/J19690001242>.

**Table S6.** Fractional Atomic Coordinates ( $\times 10^4$ ) for **1** after quantum-chemical calculation.

| Atom | x      | y      | z      |
|------|--------|--------|--------|
| Mn   | 2433.8 | 2807.5 | 5140.8 |
| Cl   | 2964.8 | 1101.3 | 4700.8 |
| P    | 2538.9 | 5851.2 | 4387.5 |

|    |        |        |        |
|----|--------|--------|--------|
| Cl | 1020.7 | 2669.7 | 4670.5 |
| P  | 3710.9 | 2971.3 | 7099.6 |
| O  | 2740.2 | 4622.4 | 4893.0 |
| O  | 3009.7 | 2911.2 | 6294.1 |
| C  | 2161.5 | 5399.9 | 3388.1 |
| C  | 3447.8 | 6840.1 | 4614.4 |
| C  | 1794.0 | 6864.1 | 4526.0 |
| C  | 3355.2 | 3701.9 | 7750.8 |
| C  | 1648.3 | 8174.4 | 4270.7 |
| H  | 2004.0 | 8631.4 | 4003.4 |
| C  | 1350.3 | 6301.8 | 4892.3 |
| H  | 1457.1 | 5280.5 | 5080.8 |
| C  | 2230.1 | 6274.9 | 2858.1 |
| H  | 2522.7 | 7230.4 | 3045.4 |
| C  | 3630.4 | 7915.5 | 5114.7 |
| H  | 3192.2 | 8243.8 | 5324.8 |
| C  | 4116.6 | 1361.6 | 7467.3 |
| C  | 1798.2 | 4162.0 | 3145.4 |
| H  | 1736.2 | 3484.3 | 3553.7 |
| C  | 615.8  | 8351.5 | 4744.1 |
| H  | 155.7  | 8922.6 | 4835.0 |
| C  | 3763.3 | 4756.2 | 8232.8 |
| H  | 4324.1 | 5148.9 | 8232.5 |
| C  | 760.9  | 7049.9 | 4998.3 |
| H  | 405.0  | 6621.9 | 5274.0 |
| C  | 5352.8 | 3750.2 | 7738.1 |
| H  | 5449.8 | 3031.8 | 8187.6 |
| C  | 4448.8 | 4851.1 | 6556.8 |
| H  | 3843.7 | 4966.3 | 6081.3 |
| C  | 4571.4 | 3924.3 | 7132.5 |
| C  | 6010.2 | 4506.3 | 7767.1 |
| H  | 6616.0 | 4369.2 | 8239.6 |
| C  | 1515.0 | 3800.5 | 2377.9 |
| H  | 1233.3 | 2838.1 | 2192.6 |
| C  | 2632.6 | 3194.3 | 7752.5 |
| H  | 2309.2 | 2386.3 | 7370.6 |
| C  | 4931.9 | 8191.1 | 5053.8 |
| H  | 5511.3 | 8711.2 | 5222.1 |
| C  | 1947.0 | 5907.2 | 2092.7 |
| H  | 2014.4 | 6569.1 | 1681.3 |

**Table S7.** Calculated singlet-singlet and spin-flip transition energies for the  $[(\text{Ph}_3\text{PO})_2\text{MnCl}_2]$  molecule of **1** (CAM-B3LYP, scalar ZORA).

| №  | Singlet-singlet transition |                |                                             | Spin-flip transition |                |
|----|----------------------------|----------------|---------------------------------------------|----------------------|----------------|
|    | Energy, eV                 | Wavelength, nm | Oscillator strength $f \cdot 10^{-6}$ , a.u | Energy, eV           | Wavelength, nm |
| 1  | 3.9690                     | 312.42         | 0.14                                        | 2.5034               | 495.32         |
| 2  | 3.9983                     | 310.13         | 610.08                                      | 2.5402               | 488.15         |
| 3  | 4.0013                     | 309.90         | 23.18                                       | 2.5920               | 478.40         |
| 4  | 4.0133                     | 308.97         | 165.41                                      | 2.5989               | 477.12         |
| 5  | 4.0224                     | 308.27         | 8.91                                        | 2.6075               | 475.55         |
| 6  | 4.0512                     | 306.08         | 14.44                                       | 2.6247               | 472.43         |
| 7  | 4.3909                     | 282.40         | 4133.28                                     | 2.6854               | 461.76         |
| 8  | 4.4286                     | 280.00         | 62.26                                       | 2.7213               | 455.66         |
| 9  | 4.4564                     | 278.25         | 120.29                                      | 2.7275               | 454.63         |
| 10 | 4.4823                     | 276.64         | 20.70                                       | 2.7553               | 450.05         |
| 11 | 4.4889                     | 276.24         | 91.92                                       | 2.7641               | 448.61         |
| 12 | 4.4986                     | 275.64         | 10.93                                       | 2.7767               | 446.58         |
| 13 | 4.5324                     | 273.58         | 102.94                                      | 2.8817               | 430.30         |

|    |        |        |          |        |        |
|----|--------|--------|----------|--------|--------|
| 14 | 4.5523 | 272.39 | 3300.23  | 2.8993 | 427.69 |
| 15 | 4.5862 | 270.38 | 1093.06  | 3.6081 | 343.67 |
| 16 | 4.6555 | 266.35 | 12473.13 | 3.7061 | 334.58 |
| 17 | 4.6629 | 265.93 | 173.78   | 3.8467 | 322.36 |
| 18 | 4.6849 | 264.68 | 802.80   | 3.9253 | 315.90 |
| 19 | 4.6905 | 264.36 | 285.90   | 3.9351 | 315.11 |
| 20 | 4.6997 | 263.85 | 855.86   | 3.9681 | 312.49 |
| 21 | 4.7066 | 263.46 | 124.41   | 3.9784 | 311.69 |
| 22 | 4.7252 | 262.42 | 5274.40  | 3.9893 | 310.83 |
| 23 | 4.7675 | 260.10 | 1328.99  | 3.9937 | 310.49 |
| 24 | 4.8567 | 255.32 | 16605.22 | 4.0062 | 309.52 |
| 25 | 4.8762 | 254.29 | 4134.04  | 4.0211 | 308.37 |

**Table S8.** Calculated spin-flip transition energies for the  $\{[(\text{Ph}_3\text{PO})_2\text{MnCl}_2]\}_2$  dimer with  $C_i$  symmetry of **1** (CAM-B3LYP, scalar ZORA). The underlined transitions has a dominant contribution of the metal-and-halide to metal transition ( $d-d$  and XMCT).

| №  | Spin-flip transition |                |
|----|----------------------|----------------|
|    | Energy, eV           | Wavelength, nm |
| 1  | 2.9148               | 425.42         |
| 2  | <u>3.0590</u>        | <u>405.36</u>  |
| 3  | 3.2662               | 379.65         |
| 4  | 3.3650               | 368.50         |
| 5  | <u>3.4207</u>        | <u>362.50</u>  |
| 6  | 3.4493               | 359.49         |
| 7  | <u>3.4961</u>        | <u>354.68</u>  |
| 8  | <u>3.6098</u>        | <u>343.51</u>  |
| 9  | <u>3.6596</u>        | <u>338.83</u>  |
| 10 | <u>3.7645</u>        | <u>329.39</u>  |
| 11 | <u>3.8095</u>        | <u>325.50</u>  |
| 12 | 3.8892               | 318.83         |
| 13 | 3.9180               | 316.49         |
| 14 | 3.9900               | 310.78         |
| 15 | <u>4.5726</u>        | <u>271.18</u>  |
| 16 | <u>4.7406</u>        | <u>261.57</u>  |
| 17 | <u>4.9553</u>        | <u>250.24</u>  |
| 18 | <u>5.0110</u>        | <u>247.46</u>  |
| 19 | <u>5.1225</u>        | <u>242.07</u>  |

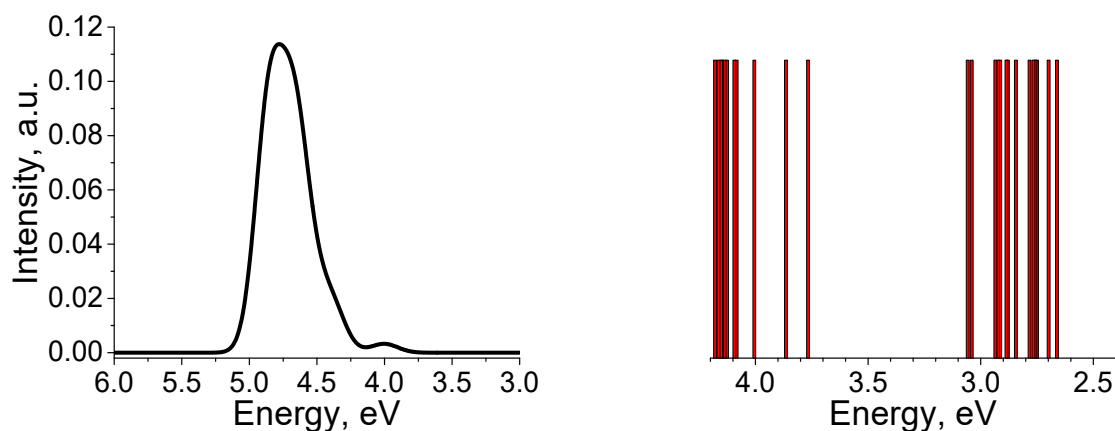

**Fig. S38.** Calculated UVVis transition spectrum with  $w = 0.2$  eV (left) and spin-flip transition energies (right) of **1**.

**Table S9.** Calculated singlet-singlet and singlet-triplet transition energies for the two different  $\{(\text{Ph}_3\text{PO})\}$  fragments of  $[(\text{Ph}_3\text{PO})_2\text{MnCl}_2]$  molecule of **1** (CAM-B3LYP, scalar ZORA).

|  | First $\{(\text{Ph}_3\text{PO})\}$ fragment | Second $\{(\text{Ph}_3\text{PO})\}$ fragment |
|--|---------------------------------------------|----------------------------------------------|
|--|---------------------------------------------|----------------------------------------------|

| №  | Singlet-singlet transition |                                              | Singlet-triplet transition | Singlet-singlet transition |                                              | Singlet-triplet transition |
|----|----------------------------|----------------------------------------------|----------------------------|----------------------------|----------------------------------------------|----------------------------|
|    | Energy, eV                 | Oscillator strength $f \cdot 10^{-3}$ , a.u. | Energy, eV                 | Energy, eV                 | Oscillator strength $f \cdot 10^{-3}$ , a.u. | Energy, eV                 |
| 1  | 5.2913                     | 3.27                                         | 3.9637                     | 5.3148                     | 4.03                                         | 3.9828                     |
| 2  | 5.3124                     | 7.48                                         | 3.9708                     | 5.3454                     | 5.52                                         | 4.0002                     |
| 3  | 5.3568                     | 14.52                                        | 4.0463                     | 5.3601                     | 3.78                                         | 4.0214                     |
| 4  | 5.5610                     | 10.84                                        | 4.5373                     | 5.4696                     | 84.48                                        | 4.5687                     |
| 5  | 5.5862                     | 81.75                                        | 4.5600                     | 5.6798                     | 28.10                                        | 4.5874                     |
| 6  | 5.7268                     | 17.90                                        | 4.5658                     | 5.8205                     | 20.05                                        | 4.6012                     |
| 7  | 5.8655                     | 197.04                                       | 4.6763                     | 5.9087                     | 1.92                                         | 4.6833                     |
| 8  | 5.9022                     | 40.00                                        | 4.6821                     | 6.0135                     | 50.50                                        | 4.6939                     |
| 9  | 6.1468                     | 52.47                                        | 4.7183                     | 6.1658                     | 50.50                                        | 4.7070                     |
| 10 | 6.2835                     | 1.63                                         | 5.1156                     | 6.1729                     | 41.76                                        | 5.1010                     |
| 11 | 6.3241                     | 30.39                                        | 5.1190                     | 6.2813                     | 17.19                                        | 5.1334                     |
| 12 | 6.4401                     | 74.48                                        | 5.1825                     | 6.3029                     | 8.81                                         | 5.1685                     |
| 13 | 6.4956                     | 22.62                                        | 5.3995                     | 6.3812                     | 56.22                                        | 5.3992                     |
| 14 | 6.5342                     | 2.90                                         | 5.4167                     | 6.4798                     | 12.85                                        | 5.5136                     |
| 15 | 6.5429                     | 4.78                                         | 5.6421                     | 6.6169                     | 42.01                                        | 5.6720                     |
| 16 | 6.5868                     | 6.56                                         | 5.7794                     | 6.7038                     | 120.51                                       | 5.7946                     |
| 17 | 6.6034                     | 1.41                                         | 6.1267                     | 6.7224                     | 64.89                                        | 5.9255                     |
| 18 | 6.6452                     | 41.77                                        | 6.2517                     | 6.7661                     | 16.37                                        | 6.1066                     |
| 19 | 6.7241                     | 272.65                                       | 6.4113                     | 6.7864                     | 13.56                                        | 6.3906                     |
| 20 | 6.7720                     | 86.88                                        | 6.4406                     | 6.8002                     | 74.04                                        | 6.4430                     |
| 21 | 6.8386                     | 124.89                                       | 6.5133                     | 6.8392                     | 241.39                                       | 6.5029                     |
| 22 | 6.8621                     | 119.88                                       | 6.5417                     | 6.8735                     | 25.21                                        | 6.6548                     |
| 23 | 6.8724                     | 10.31                                        | 6.5509                     | 6.8755                     | 6.88                                         | 6.6791                     |
| 24 | 6.8919                     | 179.71                                       | 6.6581                     | 6.9229                     | 14.07                                        | 6.6991                     |
| 25 | 6.9535                     | 51.31                                        | 6.7126                     | 6.9492                     | 42.85                                        | 6.7563                     |

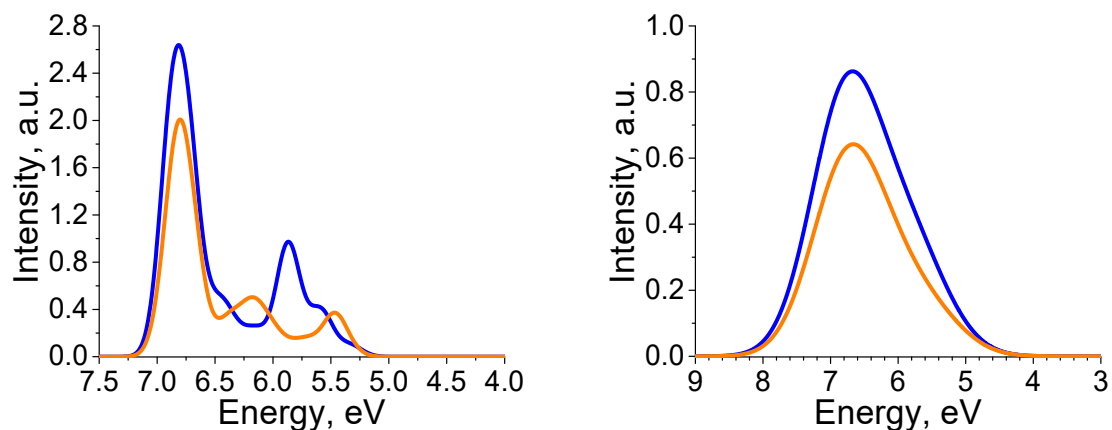

**Fig. S39.** Calculated UVVis transition spectra with  $w = 0.2$  eV (left) and  $w = 1.0$  eV (right) for the two different  $\{(\text{Ph}_3\text{PO})\}$  fragments of  $[(\text{Ph}_3\text{PO})_2\text{MnCl}_2]$  molecule of **1**.

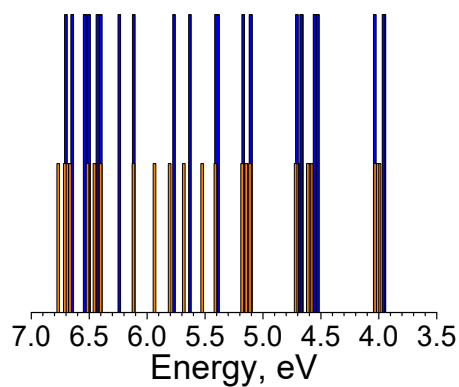

**Fig. S40.** Calculated spin-flip transition energies for the two different  $\{(\text{Ph}_3\text{PO})\}$  fragments of  $[(\text{Ph}_3\text{PO})_2\text{MnCl}_2]$  molecule of **1**.

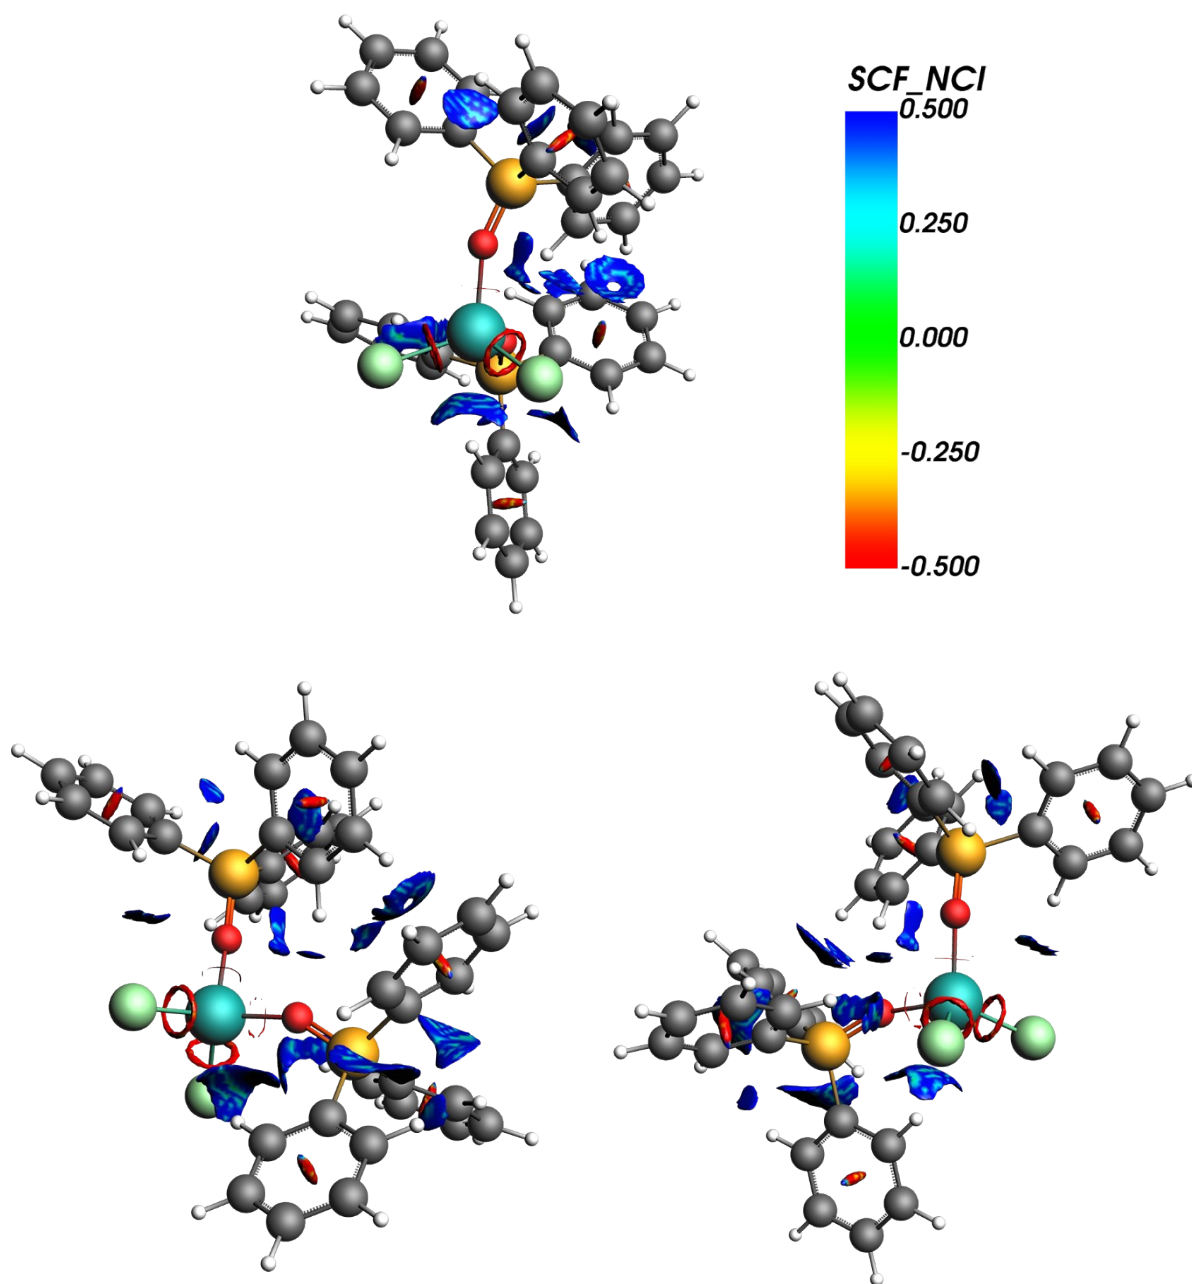

**Fig. S41.** The noncovalent interaction (NCI) plots for the  $[(\text{Ph}_3\text{PO})_2\text{MnCl}_2]$  molecule of **1**. NCIs (SCF density) are presented by isosurfaces ( $s = 0.5$  a.u.,  $\rho = 0.02$  a.u.) colored according to  $\text{sign}(\lambda_2)\rho$  in the red-green-blue scheme.



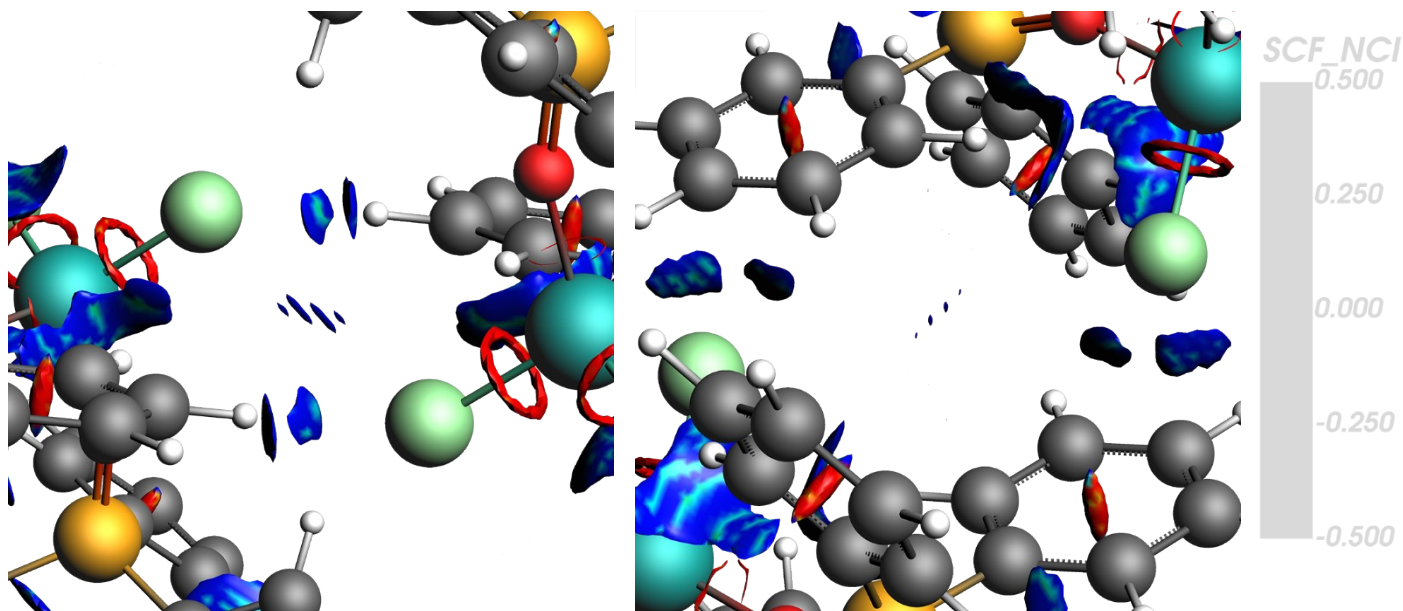

**Fig. S42.** The noncovalent interaction (NCI) plots for the  $\{[(\text{Ph}_3\text{PO})_2\text{MnCl}_2]\}_2$  dimer ( $C_i$  symmetry) of **1**. NCIs (SCF density) are presented by isosurfaces ( $s = 0.5$  a.u.,  $\rho = 0.02$  a.u.) colored according to  $\text{sign}(\lambda_2)\rho$  in the red-green-blue scheme.

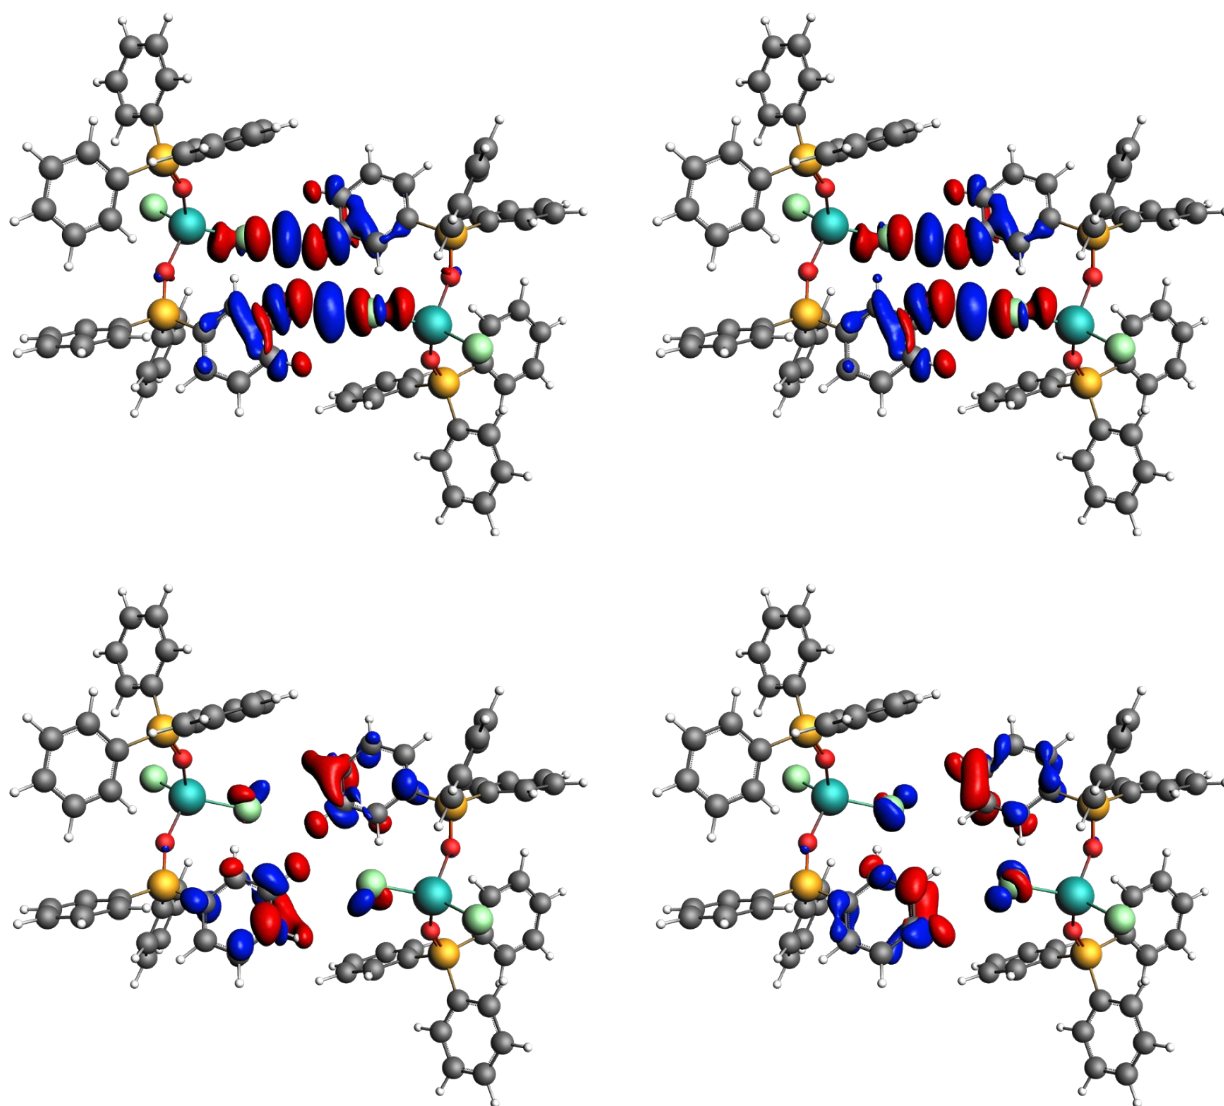

**Fig. S43.** The calculated deformation density  $\Delta\rho_i$  ( $\alpha$ -spin) for the  $\{[(\text{Ph}_3\text{PO})_2\text{MnCl}_2]\}_2$  dimer ( $C_i$  symmetry) formation from the two monomers  $[(\text{Ph}_3\text{PO})_2\text{MnCl}_2]$  of **1** with NOCV eigenvalues: left-top  $-|V| = 0.0475$ ; right-top  $-|V| = 0.0436$ ; left-bottom  $-|V| = 0.0297$ ; right-bottom  $-|V| = 0.0293$ . Red for  $\Delta\rho_i < 0$  and blue for  $\Delta\rho_i > 0$ .

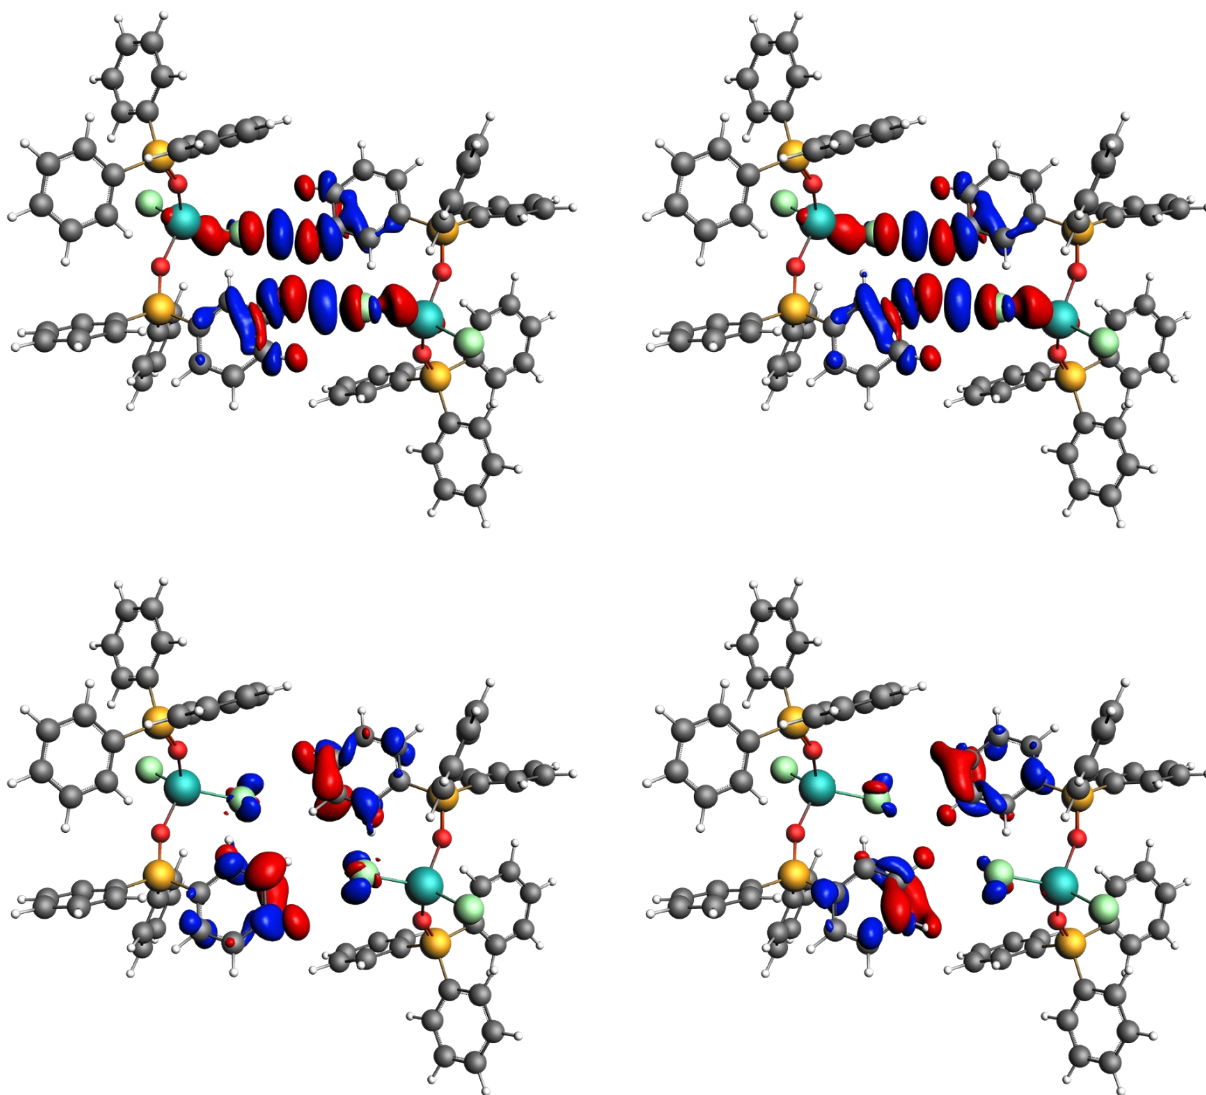

**Fig. S44.** The calculated deformation density  $\Delta\rho_i$  ( $\beta$ -spin) for the  $\{[(\text{Ph}_3\text{PO})_2\text{MnCl}_2]\}_2$  dimer ( $C_i$  symmetry) formation from the two monomers  $[(\text{Ph}_3\text{PO})_2\text{MnCl}_2]$  of **1** with NOCV eigenvalues: left-top  $-|\mathcal{V}| = 0.0403$ ; right-top  $-|\mathcal{V}| = 0.0387$ ; left-bottom  $-|\mathcal{V}| = 0.0252$ ; right-bottom  $-|\mathcal{V}| = 0.0246$ . Red for  $\Delta\rho_i < 0$  and blue for  $\Delta\rho_i > 0$ .

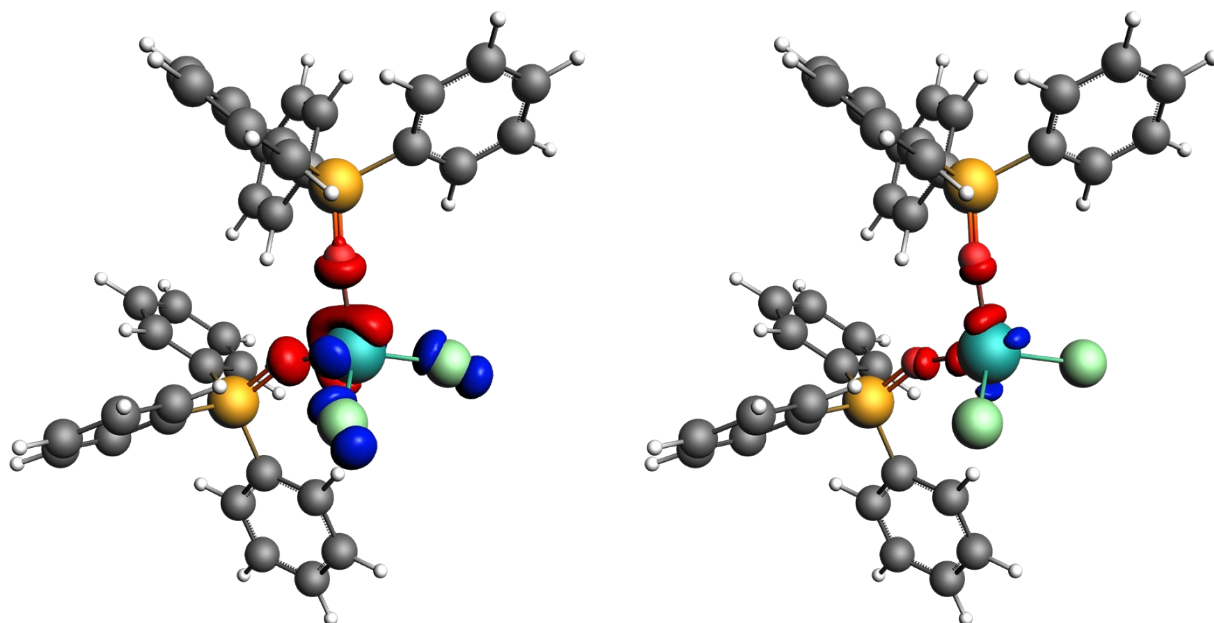

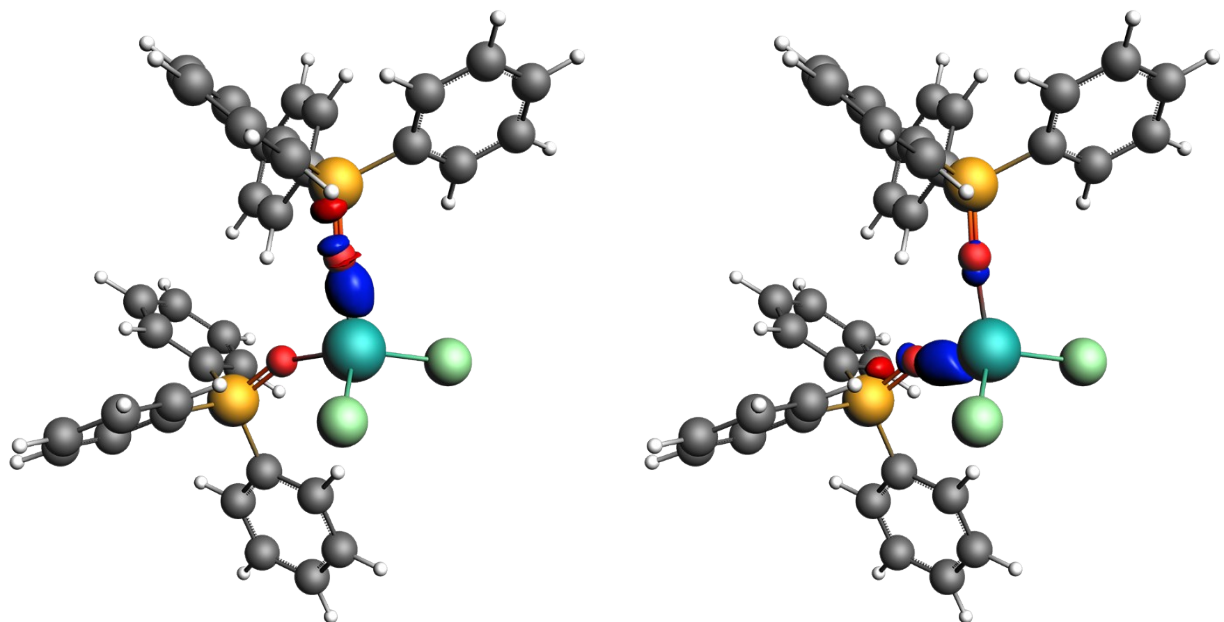

**Fig. S45.** The calculated deformation density  $\Delta\rho_i$  ( $\alpha$ -spin) for the  $[(\text{Ph}_3\text{PO})_2\text{MnCl}_2]$  molecule formation from the two  $\{(\text{Ph}_3\text{PO})_2\}$  fragments and  $\{\text{MnCl}_2\}$  fragment of **1** with NOCV eigenvalues: left-top  $-|V| = 0.2776$ ; right-top  $-|V| = 0.1712$ ; left-bottom  $-|V| = 0.0985$ ; right-bottom  $-|V| = 0.0904$ . Red for  $\Delta\rho_i < 0$  and blue for  $\Delta\rho_i > 0$ .

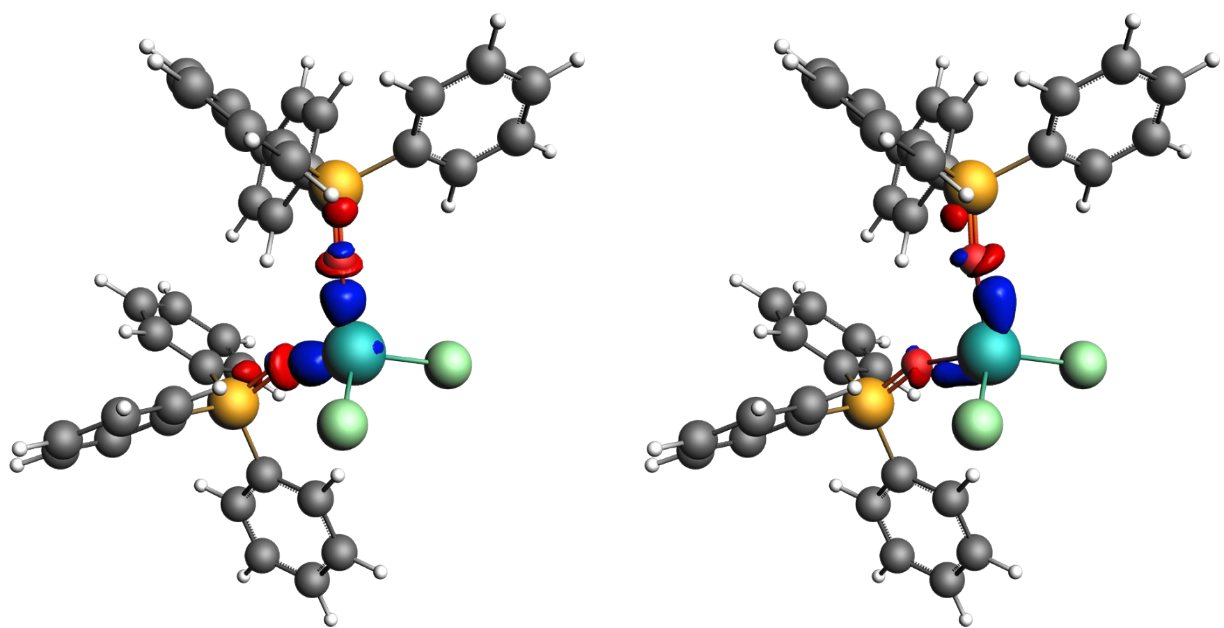

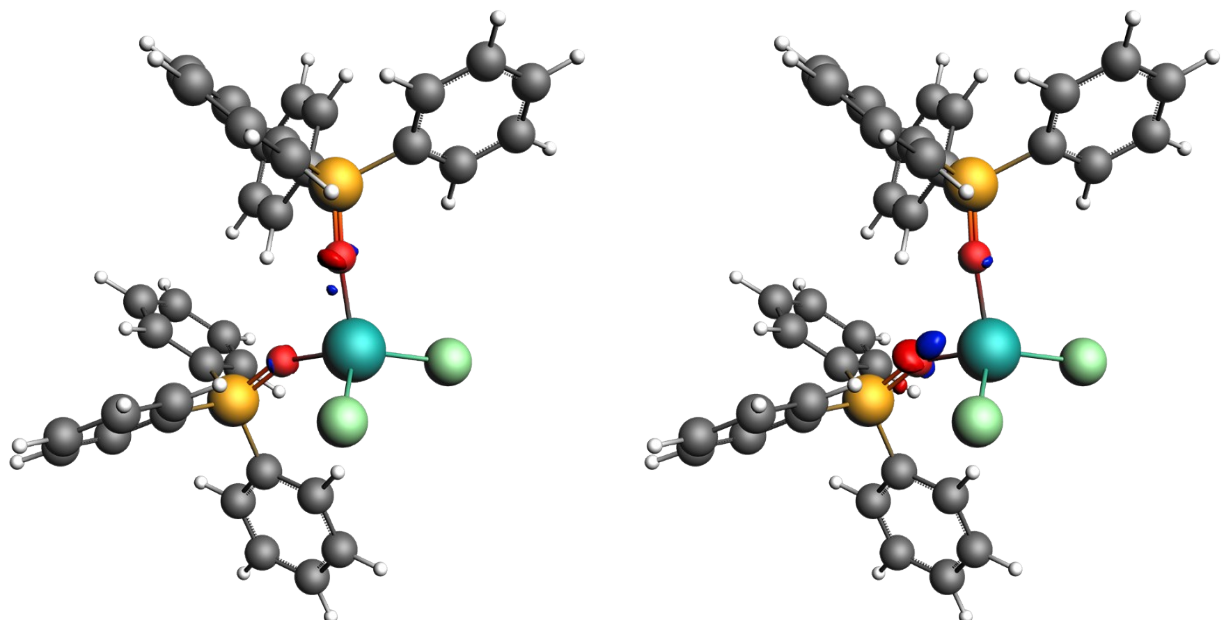

**Fig. S46.** The calculated deformation density  $\Delta\rho_i$  ( $\beta$ -spin) for the  $[(\text{Ph}_3\text{PO})_2\text{MnCl}_2]$  molecule formation from the two  $\{(\text{Ph}_3\text{PO})_2\}$  fragments and  $\{\text{MnCl}_2\}$  fragment of **1** with NOCV eigenvalues: left-top –  $|V| = 0.1900$ ; right-top –  $|V| = 0.1552$ ; left-bottom –  $|V| = 0.1340$ ; right-bottom –  $|V| = 0.1279$ . Red for  $\Delta\rho_i < 0$  and blue for  $\Delta\rho_i > 0$ .

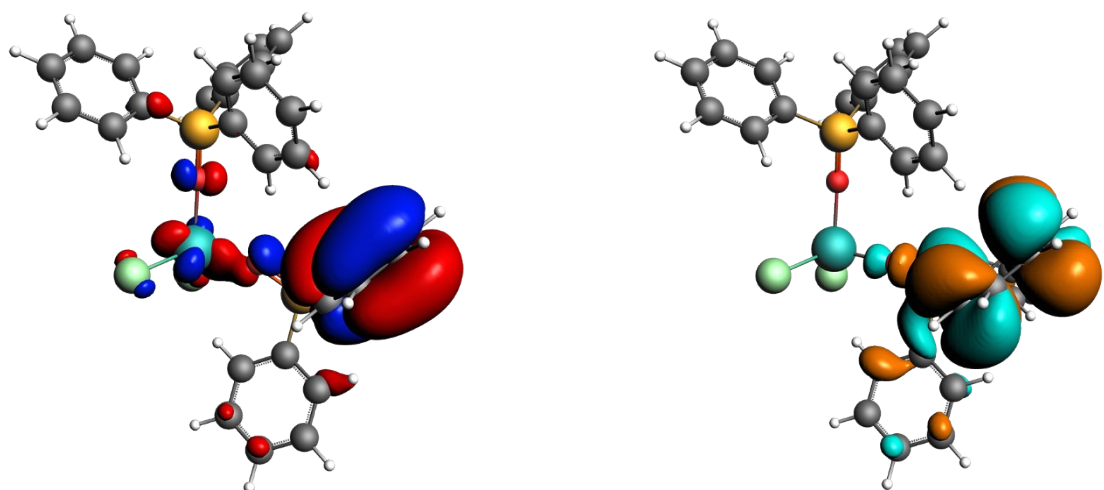

**Fig. S47.** Occupied (HOMO-20) (left) and unoccupied (LUMO) (right)  $\alpha$ -spin orbitals of the  $[(\text{Ph}_3\text{PO})_2\text{MnCl}_2]$  involved to the singlet-singlet excitation (transition number 2) using CAM-B3LYP functional.

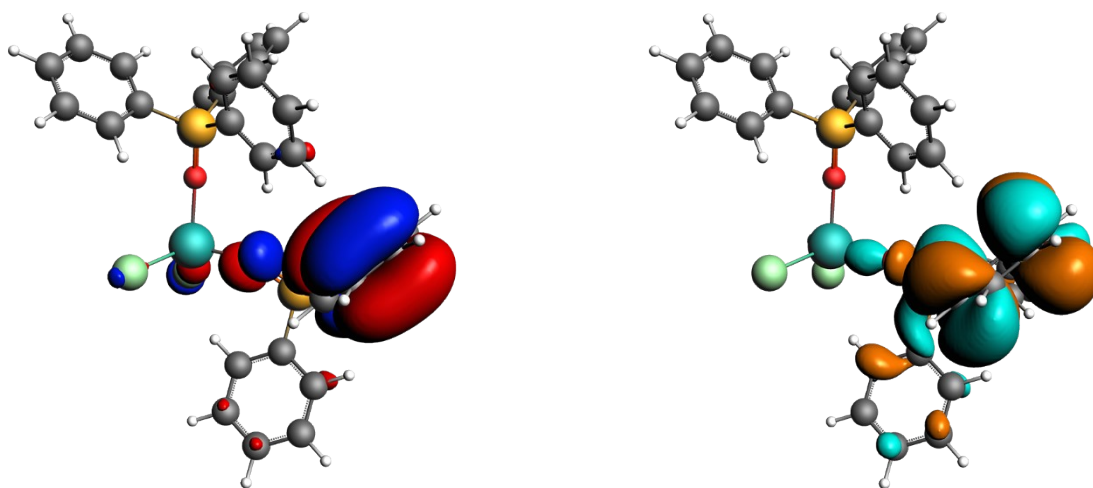

**Fig. S48.** Occupied (HOMO-17) (left) and unoccupied (LUMO) (right)  $\beta$ -spin orbitals of the  $[(\text{Ph}_3\text{PO})_2\text{MnCl}_2]$  involved to the singlet-singlet excitation (transition number 2) using CAM-B3LYP functional.

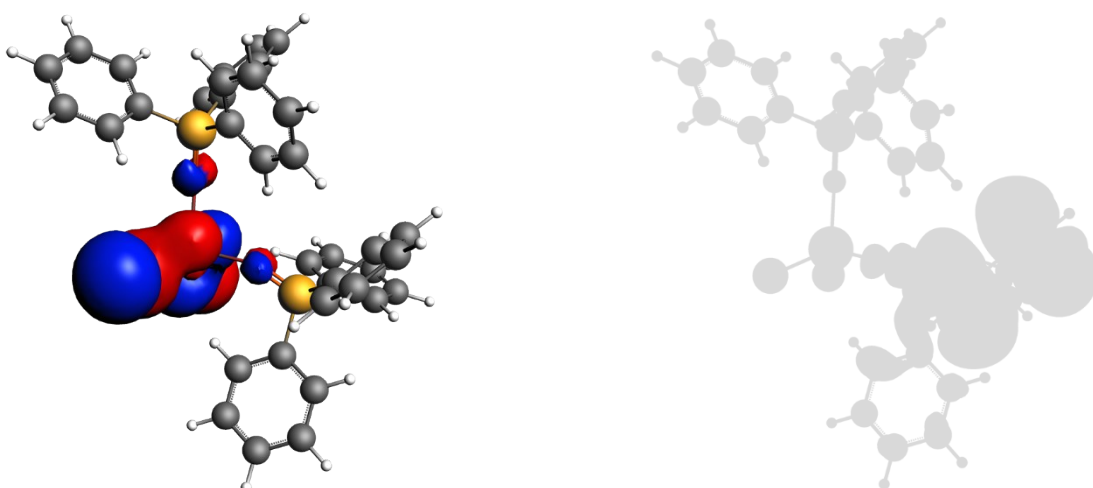

**Fig. S49.** Occupied (HOMO) (left) and unoccupied (LUMO) (right)  $\alpha$ -spin orbitals of the  $[(\text{Ph}_3\text{PO})_2\text{MnCl}_2]$  involved to the singlet-singlet excitation (transition number 7) using CAM-B3LYP functional.

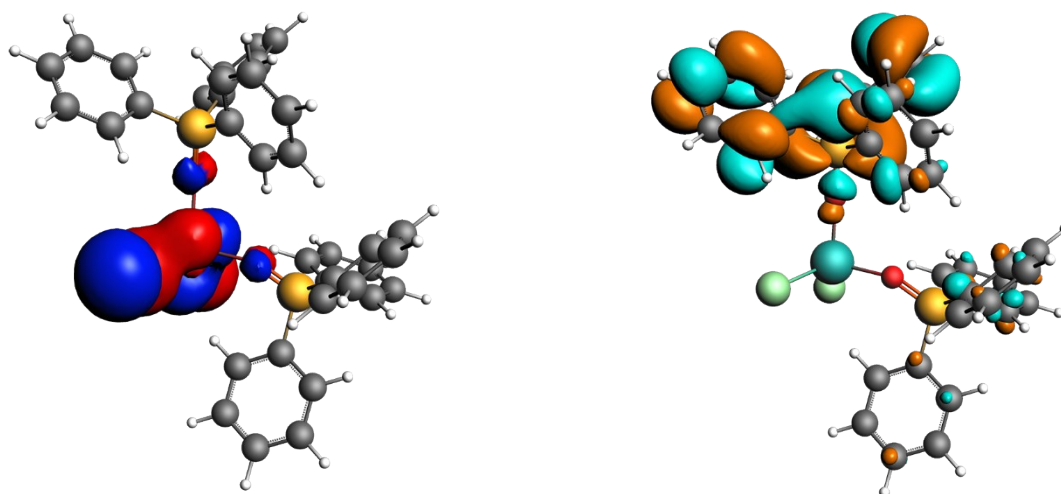

**Fig. S50.** Occupied (HOMO) (left) and unoccupied (LUMO+3)  $\alpha$ -spin orbitals of the  $[(\text{Ph}_3\text{PO})_2\text{MnCl}_2]$  involved to the singlet-singlet excitation (transition number 14) using CAM-B3LYP functional.

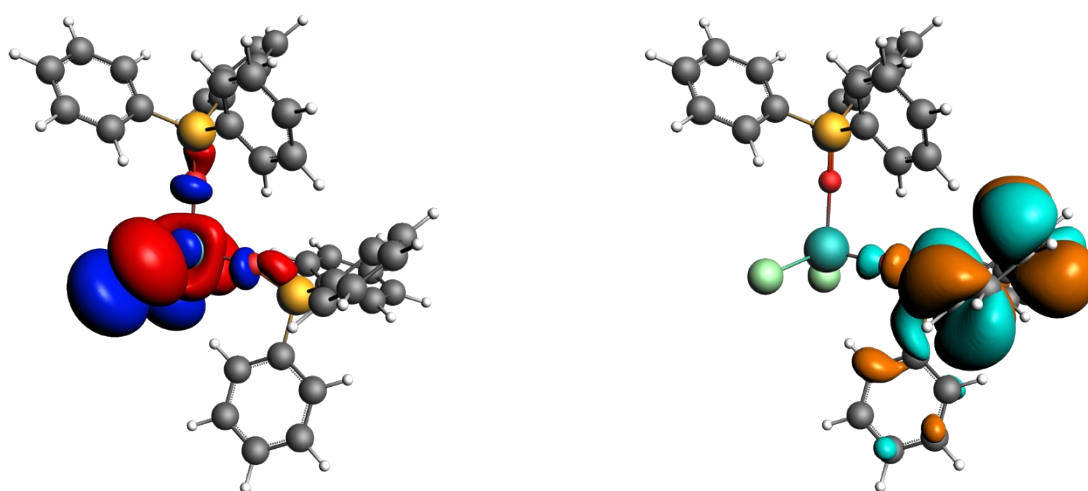

**Fig. S51.** Occupied (HOMO-1) (left) and unoccupied (LUMO) (right)  $\alpha$ -spin orbitals of the  $[(\text{Ph}_3\text{PO})_2\text{MnCl}_2]$  involved to the singlet-singlet excitation (transition number 16) using CAM-B3LYP functional.

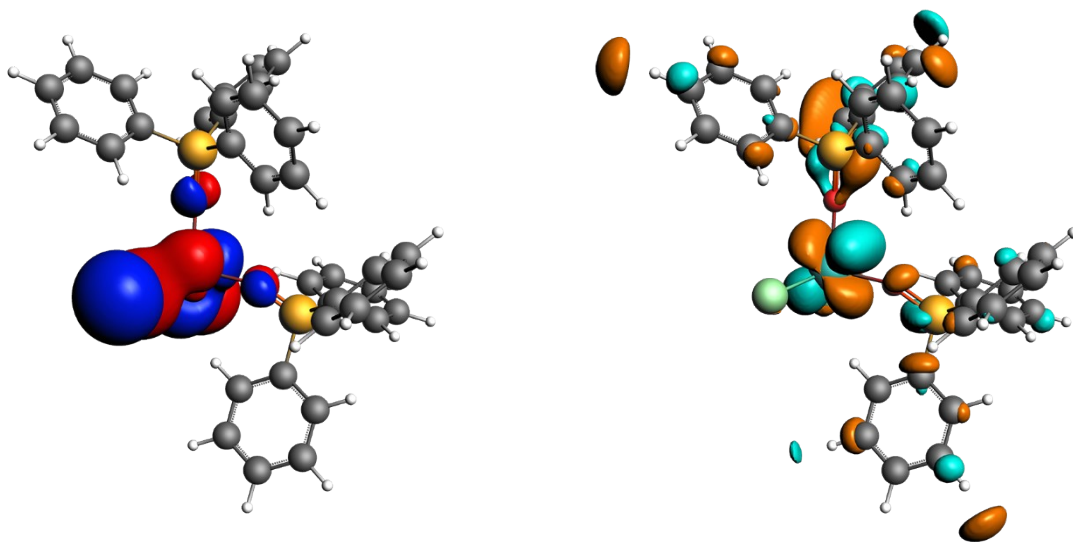

**Fig. S52.** Occupied (HOMO) (left) and unoccupied (LUMO+23) (right) orbitals of the  $[(\text{Ph}_3\text{PO})_2\text{MnCl}_2]$  involved to the spin-flip transition (number 1) using CAM-B3LYP functional.

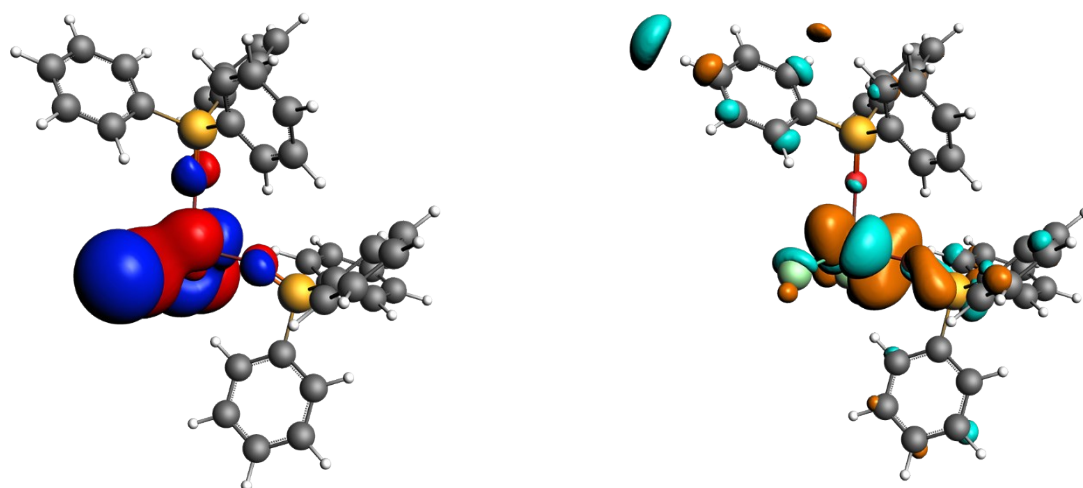

**Fig. S53.** Occupied (HOMO) (left) and unoccupied (LUMO+25) (right) orbitals of the  $[(\text{Ph}_3\text{PO})_2\text{MnCl}_2]$  involved to the spin-flip transition (number 1) using CAM-B3LYP functional.

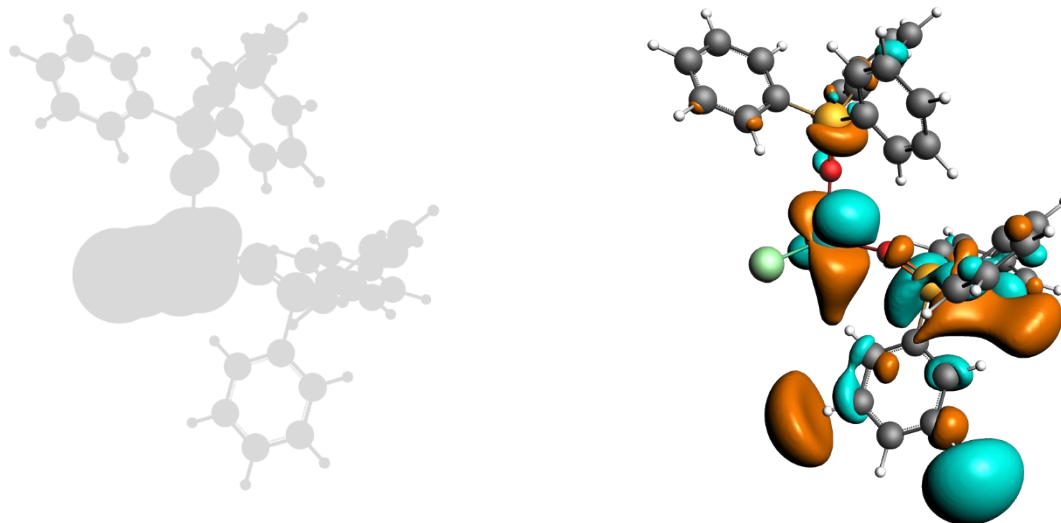

**Fig. S54.** Occupied (HOMO) (left) and unoccupied (LUMO+21) (right) orbitals of the  $[(\text{Ph}_3\text{PO})_2\text{MnCl}_2]$  involved to the spin-flip transition (number 1) using CAM-B3LYP functional.

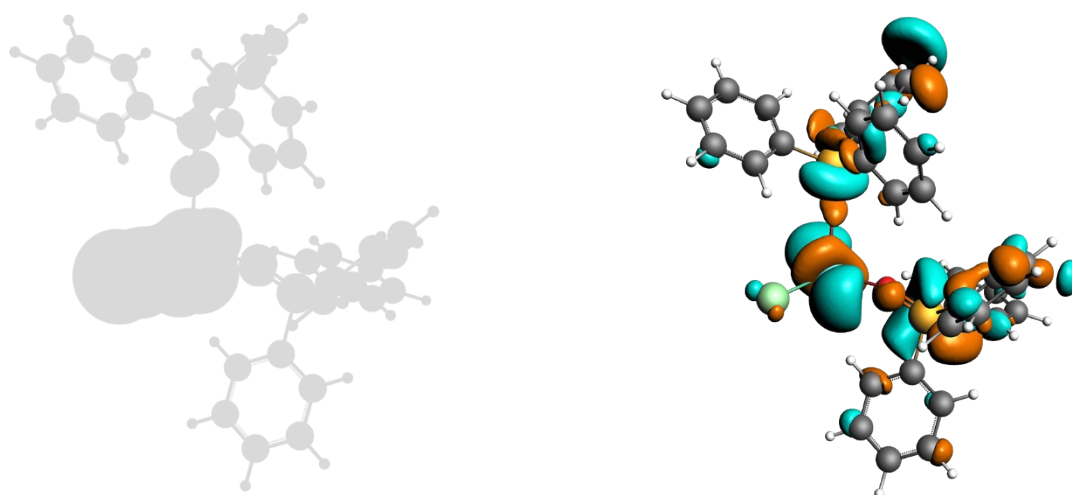

**Fig. S55.** Occupied (HOMO) (left) and unoccupied (LUMO+22) (right) orbitals of the  $[(\text{Ph}_3\text{PO})_2\text{MnCl}_2]$  involved to the spin-flip transition (number 2) using CAM-B3LYP functional.



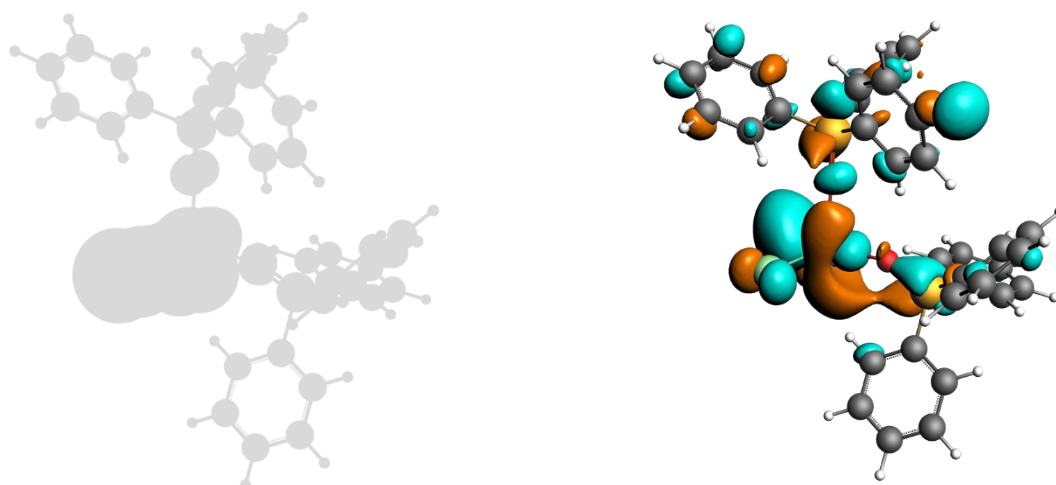

**Fig. S56.** Occupied (HOMO) (left) and unoccupied (LUMO+29) (right) orbitals of the  $[(\text{Ph}_3\text{PO})_2\text{MnCl}_2]$  involved to the spin-flip transition (number 9) using CAM-B3LYP functional.

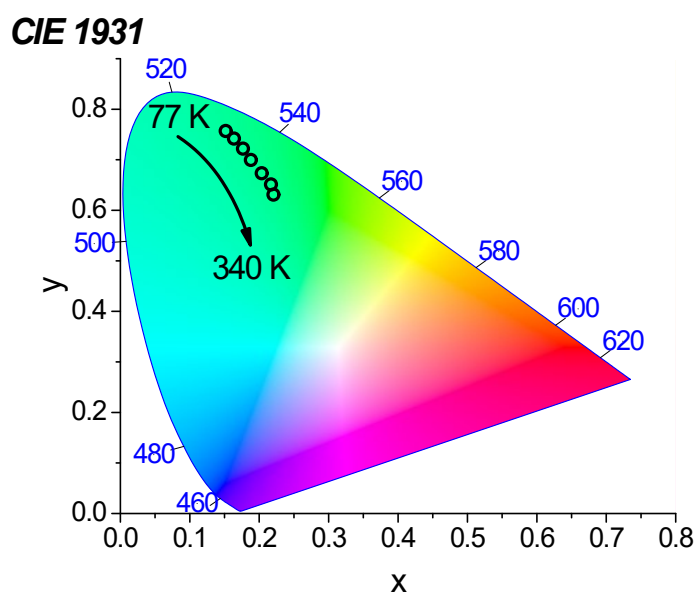

**Fig. S57.** Temperature dependences of the photoluminescence chromaticity of **1** ( $\lambda_{\text{Ex}} = 275 \text{ nm}$ ).

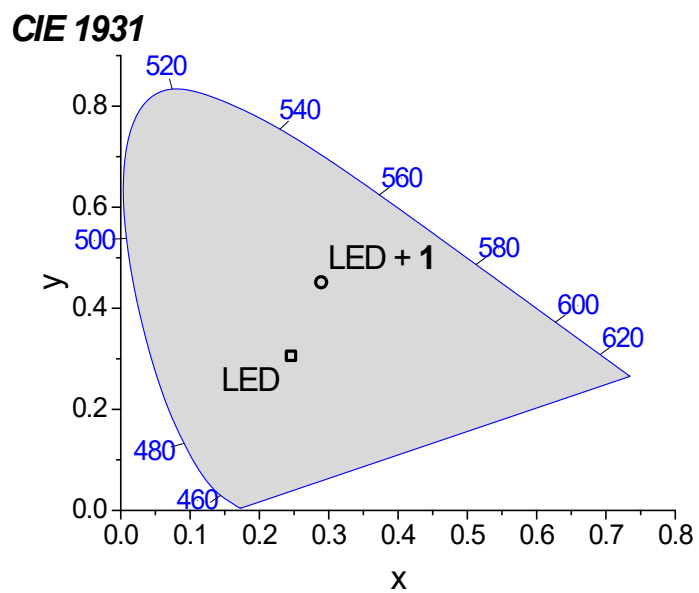

**Fig. S58.** Chromaticity of LED emission and photoluminescence of **1** excited by LED with  $\lambda_{\text{max}}=275$ .
